# Supplementary material for: Structural influence of antibody recruiting glycodendrimers (ARGs) on antitumoral cytotoxicity
Source: Royal Society of Chemistry journal article supplement (doi:10.1039/d1bm00485a), 2021-01-01
Supplement: d1bm00485a1.pdf [file d1bm00485a1.pdf]

## Electronic Supplementary Information

### Structural influence of Antibody Recruiting Glycodendrimers (ARGs) on antitumoral cytotoxicity

Biagio Todaro,<sup>‡a</sup> Silvia Achilli,<sup>‡a</sup> Benjamin Liet,<sup>a</sup> Eugénie Laigre,<sup>a</sup> Claire Tiertant,<sup>a</sup>  
David Goyard,<sup>a</sup> Nathalie Berthet<sup>\*a</sup> and Olivier Renaudet<sup>\*a</sup>

<sup>a</sup> Univ. Grenoble Alpes, CNRS, DCM UMR 5250, F-38000 Grenoble, France

<sup>‡</sup> These authors contributed equally to this work

\*Corresponding author: [nathalie.berthet@univ-grenoble-alpes.fr](mailto:nathalie.berthet@univ-grenoble-alpes.fr);  
[olivier.renaudet@univ-grenoble-alpes.fr](mailto:olivier.renaudet@univ-grenoble-alpes.fr)

|                                                           |    |
|-----------------------------------------------------------|----|
| Synthetic procedures and compounds' characterization..... | 1  |
| Flow cytometry and confocal microscopy.....               | 30 |
| Cytotoxicity towards BT-549 cells.....                    | 32 |
| References.....                                           | 33 |

## NMR and MS of final compounds

### Compound 3

Prepared according already described procedure. Analyses were in agreement with the literature.<sup>2</sup>

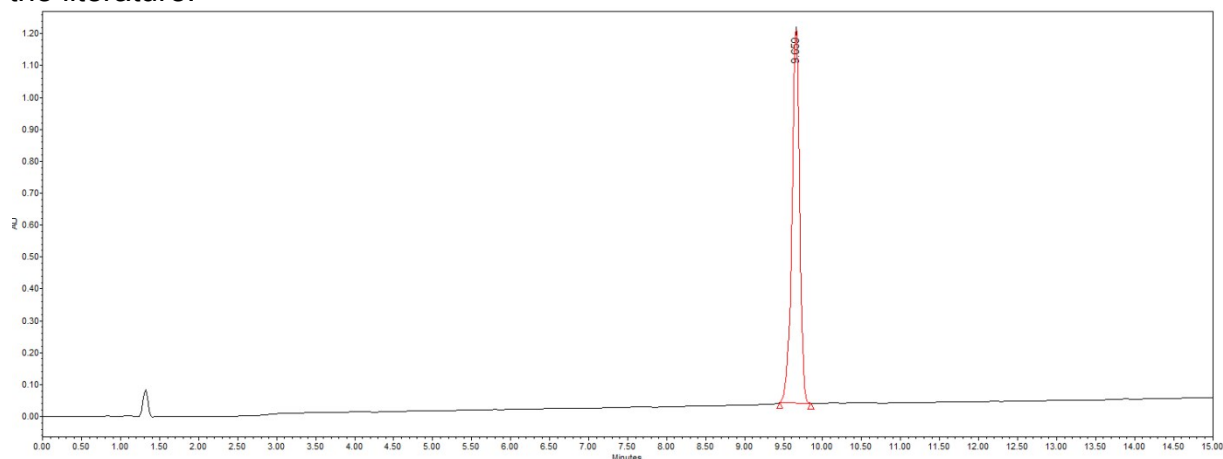

Figure S 1. RP-HPLC Spectrum of compound 3

### Compound 4

Prepared according already described procedure. Analyses were in agreement with the literature.<sup>2</sup>

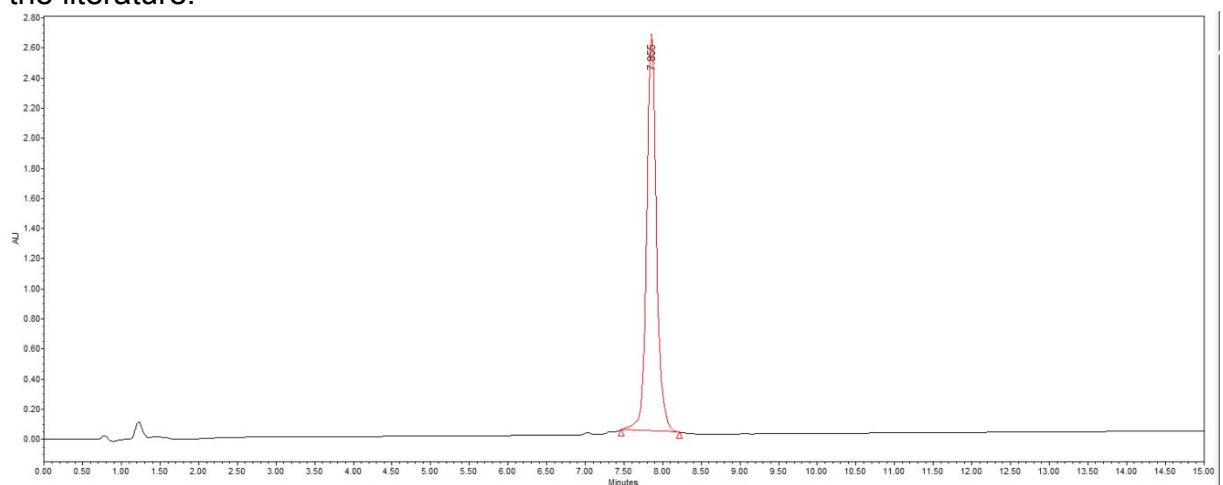

Figure S 2. RP-HPLC Spectrum of compound 4

## Compound 5

Prepared according general procedure **A** from propargyl  $\alpha$ -L-rhamnopyranoside (43.3 mg, 214  $\mu$ mol) and **2** (39.9 mg, 48.7  $\mu$ mol). The crude mixture was purified to afford the title compound as a white fluffy solid after lyophilization (70.0 mg, 43  $\mu$ mol, 88%). HRMS (ESI<sup>+</sup>-TOF)  $m/z$ : calcd for C<sub>67</sub>H<sub>112</sub>N<sub>20</sub>O<sub>27</sub> [M+2H]<sup>2+</sup>: 814.3997, found 814.3994; RP-HPLC: R<sub>t</sub> = 4.05 min (C18,  $\lambda$  = 214 nm, 5-60% B in 15 min).

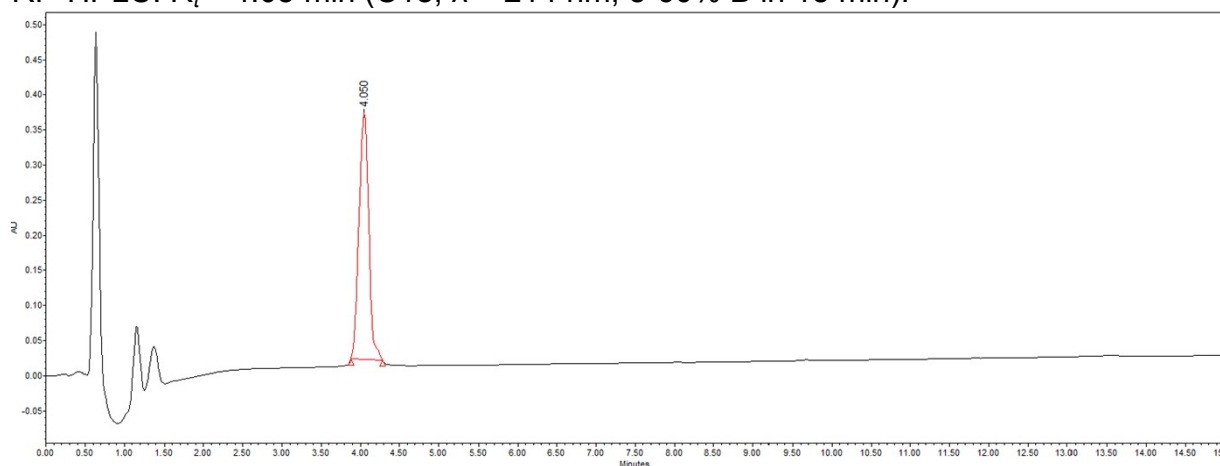

Figure S 3. RP-HPLC Spectrum of compound **5**

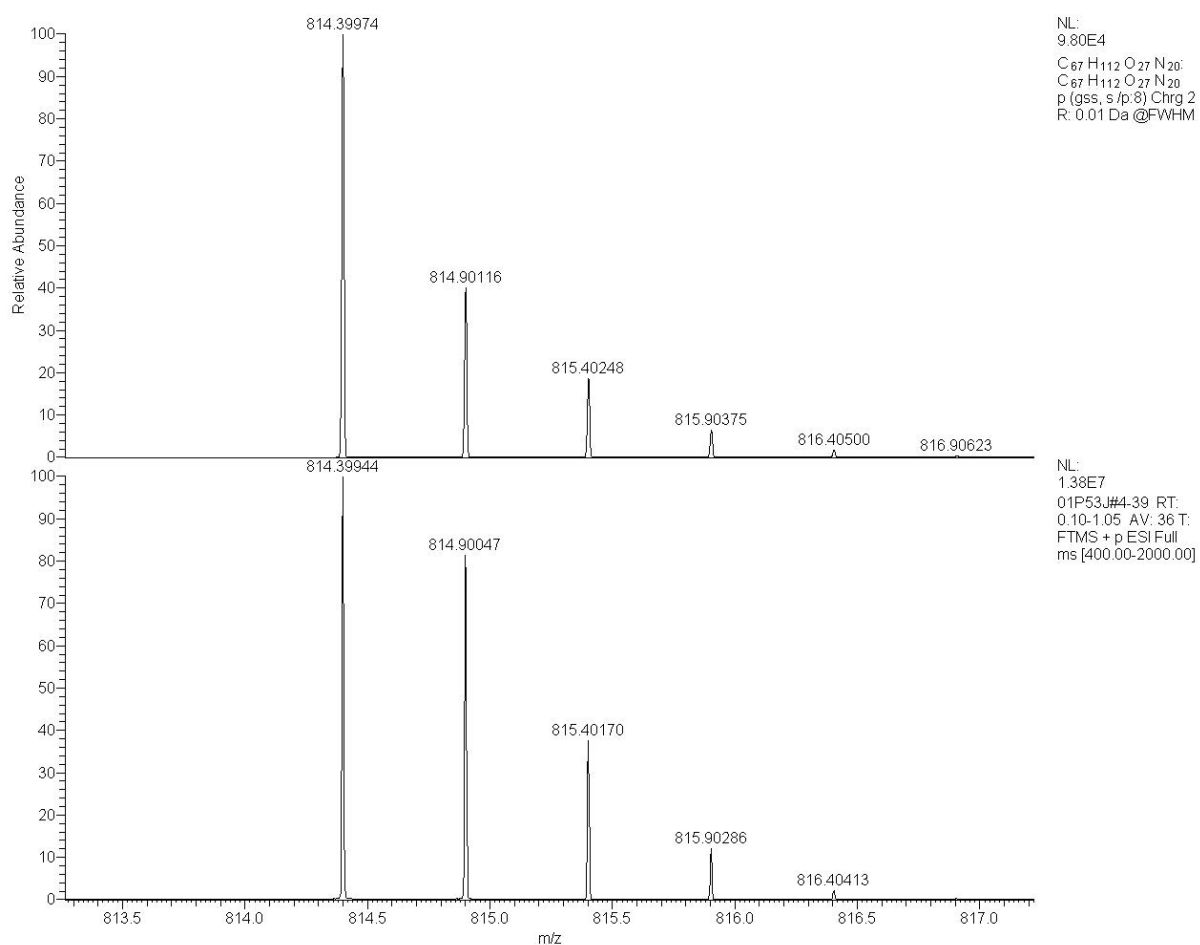

Figure S 4. HRMS spectrum of compound **5**

## Compound 6

Prepared according already described procedure. Analyses were in agreement with the literature.<sup>2</sup>

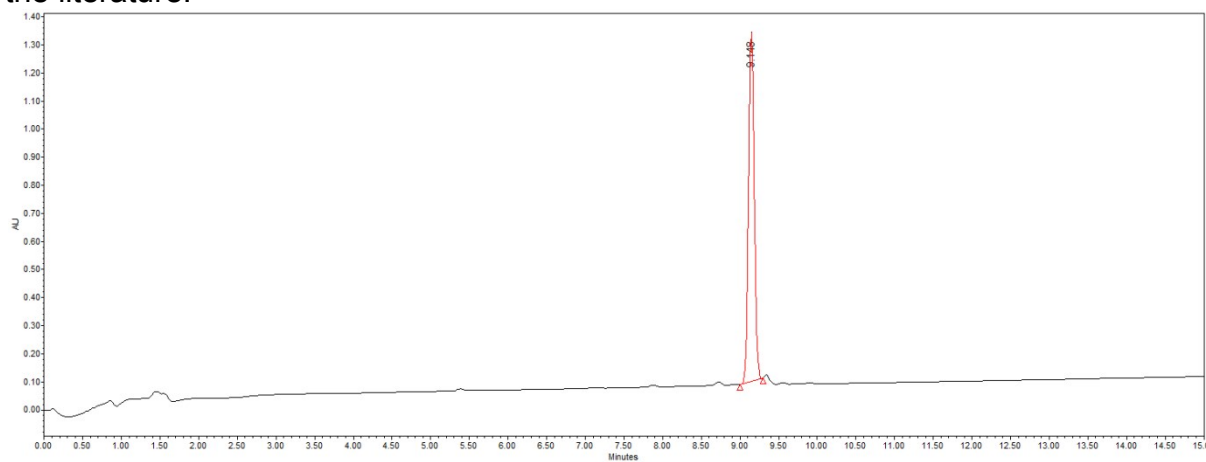

Figure S 5. RP-HPLC Spectrum of compound 6

## Compound 7

Prepared according general procedure **C** from **5** (24.2 mg, 14.9  $\mu\text{mol}$ ) and azidoacetic acid succinimide ester (4.4 mg, 22.3  $\mu\text{mol}$ ). The crude mixture was purified to afford the title compound as a white fluffy solid after lyophilization (23.0 mg, 13.4  $\mu\text{mol}$ , 90%). HRMS (ESI<sup>+</sup>-TOF)  $m/z$ : calcd for  $\text{C}_{69}\text{H}_{113}\text{N}_{23}\text{O}_{28}$   $[\text{M}+2\text{H}]^{2+}$ : 855.9057, found 855.9055; RP-HPLC:  $R_f = 4.93$  min (C18,  $\lambda = 214$  nm, 5-60% B in 15 min).

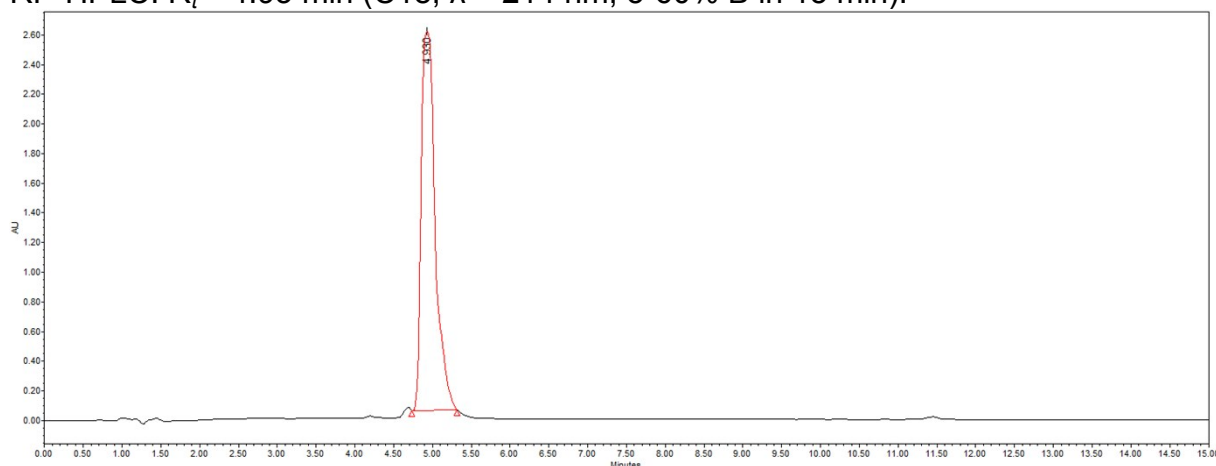

Figure S 6. RP-HPLC Spectrum of compound 7

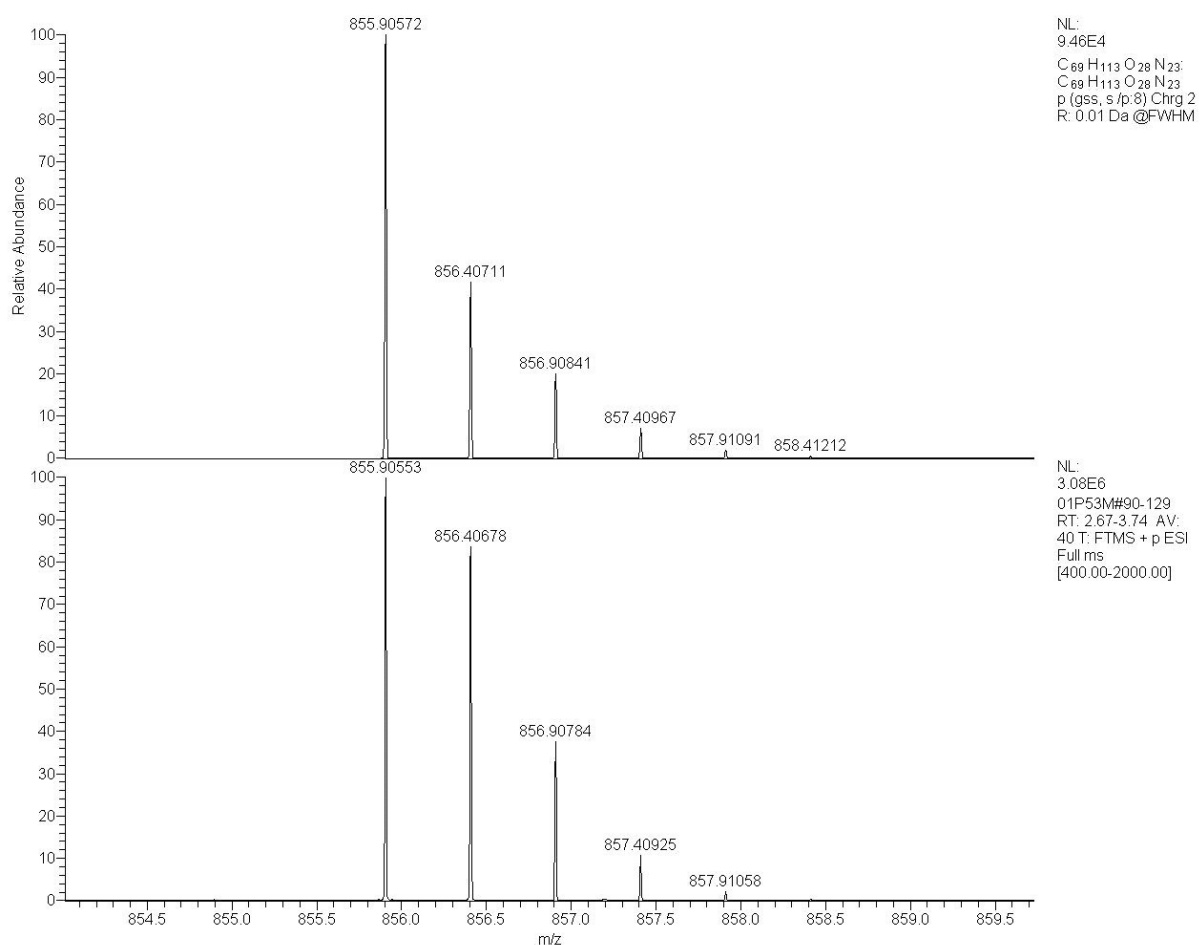

Figure S 7. HRMS spectrum of compound 7

## Compound 8

Prepared according already described procedure. Analyses were in agreement with the literature.<sup>2</sup>

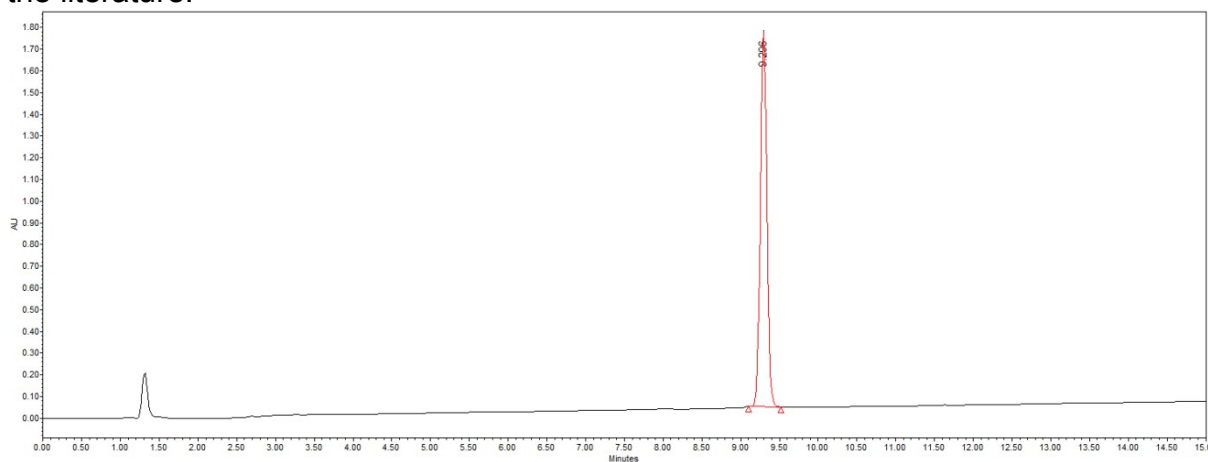

Figure S 8. RP-HPLC Spectrum of compound 8

## Compound 9

Prepared according already described procedure. Analyses were in agreement with the literature.<sup>2</sup>

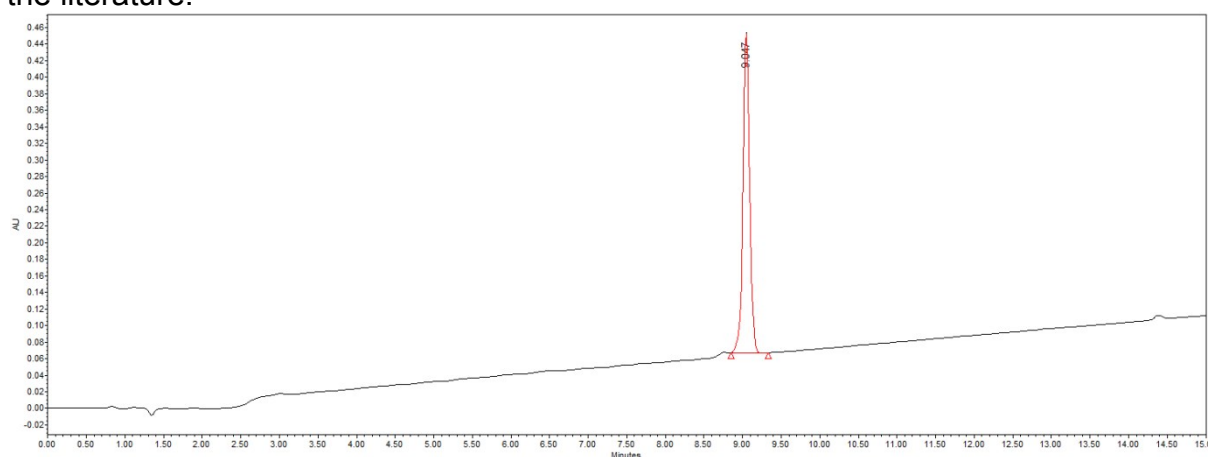

Figure S 9. RP-HPLC Spectrum of compound 9

## Compound 10

Prepared according general procedure **C** from **5** (79.3 mg, 48.7  $\mu\text{mol}$ ) and pentynoic acid succinimide ester (14.3 mg, 73.0  $\mu\text{mol}$ ). The crude mixture was purified to afford the title compound as a white fluffy solid after lyophilization (79.9 mg, 46.8  $\mu\text{mol}$ , 96%). HRMS (ESI<sup>+</sup>-TOF)  $m/z$ : calcd for C<sub>72</sub>H<sub>116</sub>N<sub>20</sub>O<sub>28</sub> [M+2H]<sup>2+</sup>: 854.4128, found 854.4125; RP-HPLC:  $R_t$  = 4.92 min (C18,  $\lambda$  = 214 nm, 5-60% B in 15 min).

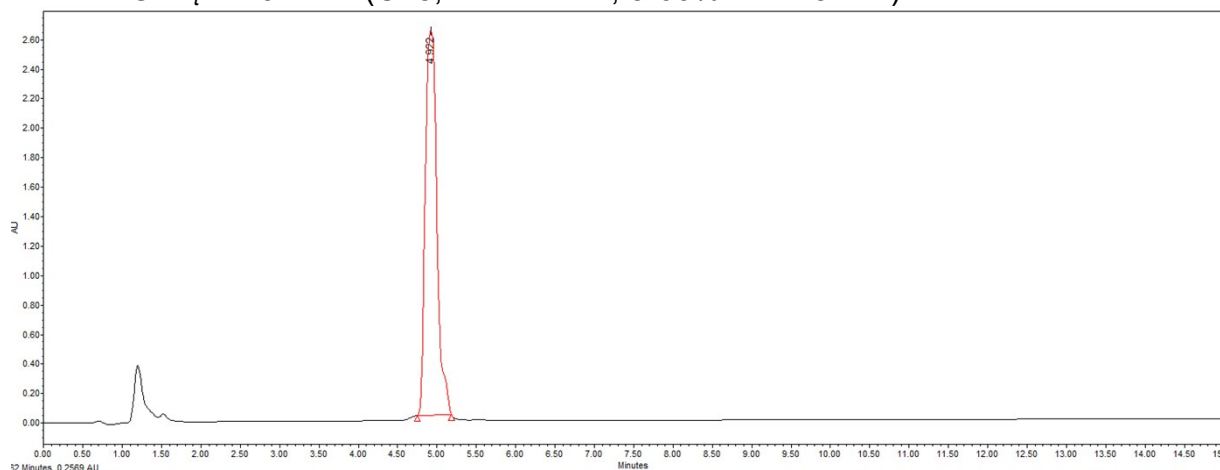

Figure S 10. RP-HPLC Spectrum of compound 10

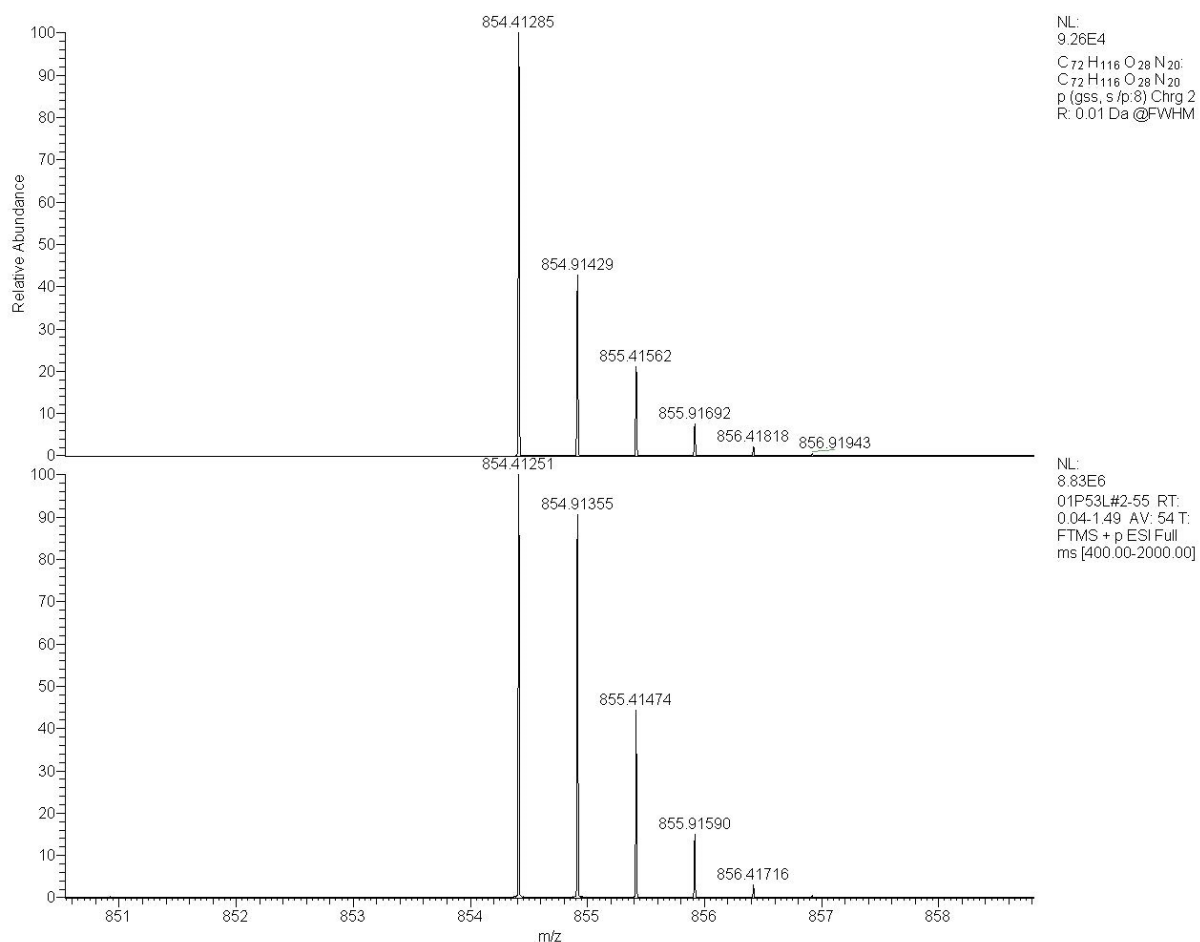

Figure S 11. HRMS spectrum of compound 10

## Compound 11

Prepared according general procedure **D** from **4** (27.9 mg, 14.4  $\mu\text{mol}$ ) and 2-[2-(2-Azidoethoxy)ethoxy]-acetic acid potassium salt (6.6 mg, 28.8  $\mu\text{mol}$ ) and PyBoP (15.3 mg, 28.8  $\mu\text{mol}$ ). The crude mixture was purified to afford the title compound as a white fluffy solid after lyophilization (22.2 mg, 10.5  $\mu\text{mol}$ , 73%). HRMS (ESI<sup>+</sup>-TOF)  $m/z$ : calcd for  $\text{C}_{89}\text{H}_{144}\text{N}_{26}\text{O}_{33}$   $[\text{M}+2\text{H}]^{2+}$ : 1052.5189, found 1052.5207; RP-HPLC:  $R_t$  = 6.71 min (C18,  $\lambda$  = 214 nm, 5-60% B in 15 min).

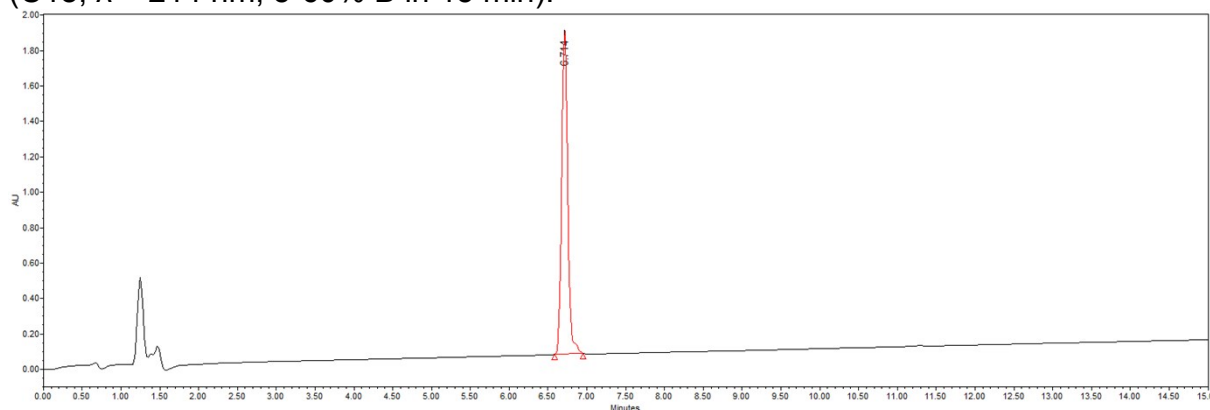

Figure S 12. RP-HPLC Spectrum of compound **11**

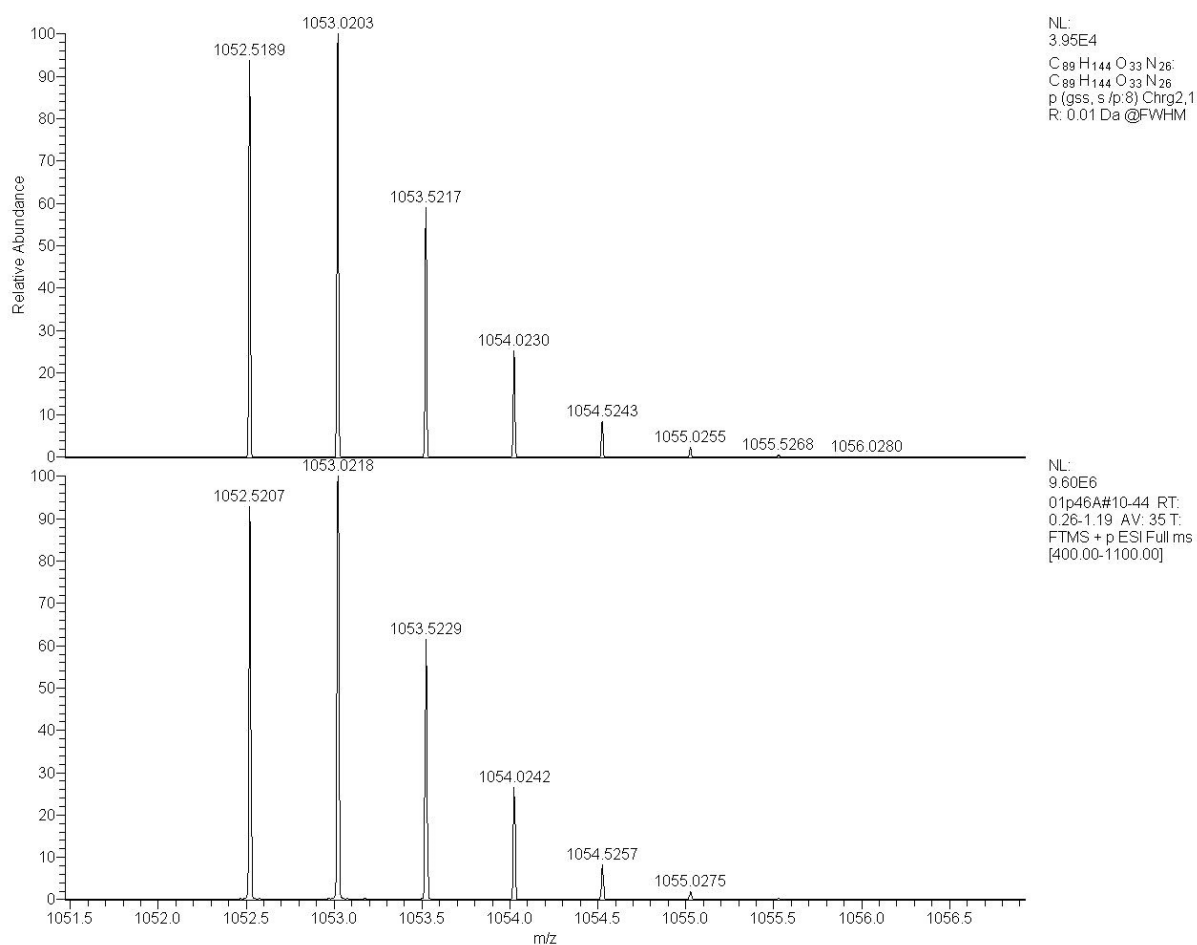

Figure S 13. HRMS spectrum of compound **11**



## Compound 12

Prepared according already described procedure. Analyses were in agreement with the literature.<sup>2</sup>

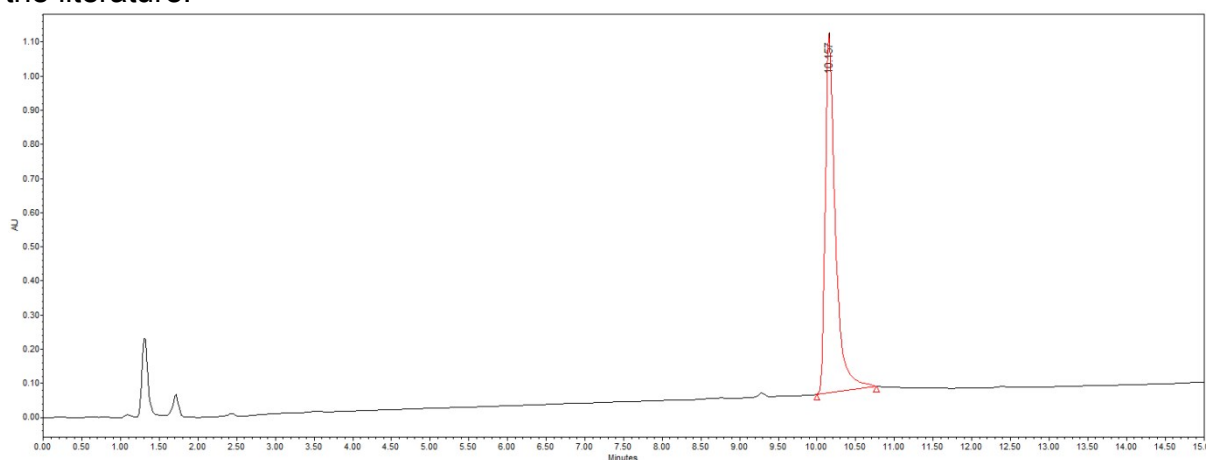

Figure S 14. RP-HPLC Spectrum of compound 12

## Compound 13

Prepared according general procedure **A** from **8** (36.9 mg, 18.0  $\mu\text{mol}$ ) and **2** (3.4 mg, 4.0  $\mu\text{mol}$ ). The crude mixture was purified to afford the title compound as a white fluffy solid after lyophilization (29.0 mg, 3.3  $\mu\text{mol}$ , 82%). HRMS (ESI<sup>+</sup>-TOF)  $m/z$ : calcd for  $\text{C}_{383}\text{H}_{602}\text{N}_{112}\text{O}_{131}$   $[\text{M}+5\text{H}]^{5+}$ : 1775.0872, found 1775.0887; RP-HPLC:  $R_t = 8.76$  min (C18,  $\lambda = 214$  nm, 5-40% B in 15 min).

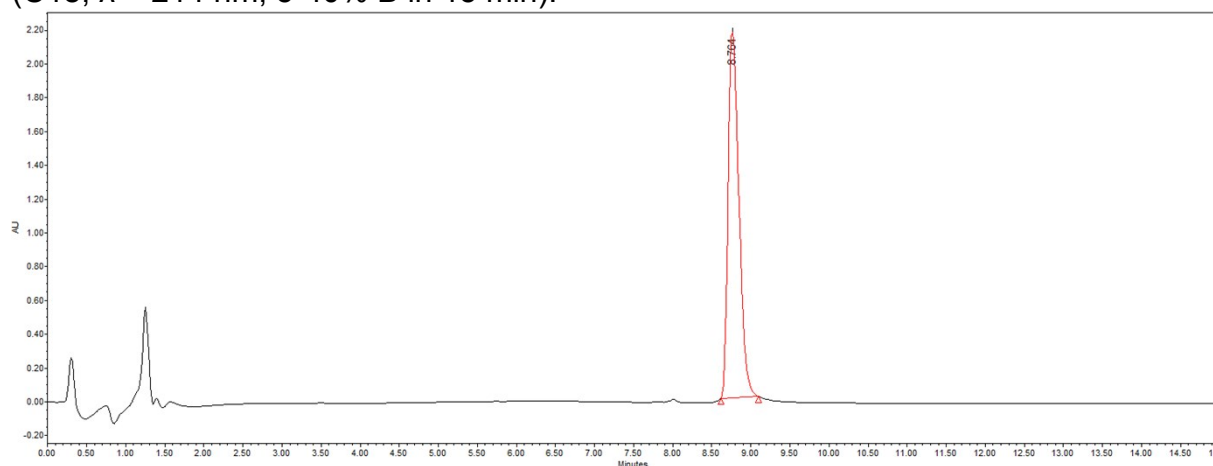

Figure S 15. RP-HPLC Spectrum of compound 13

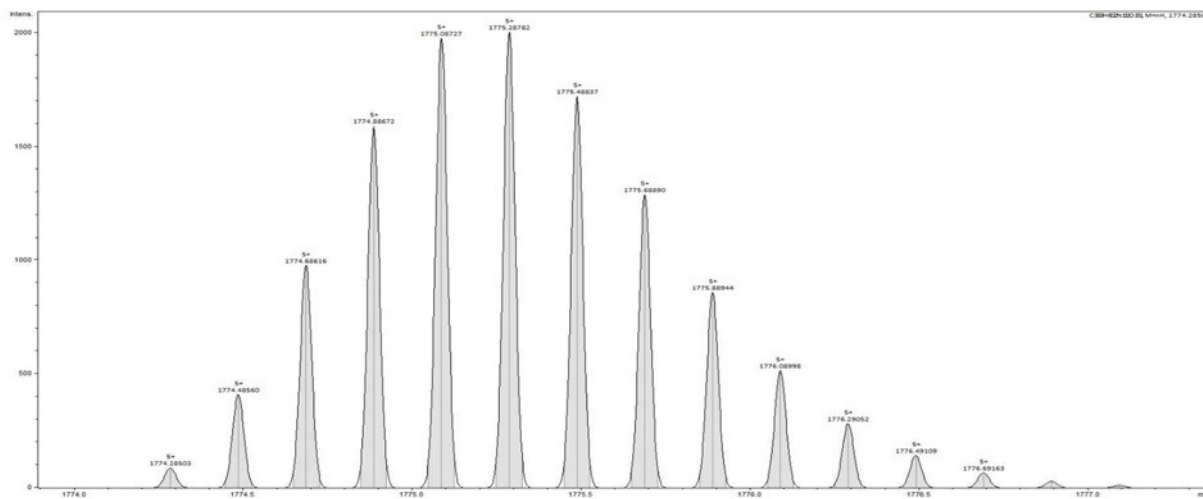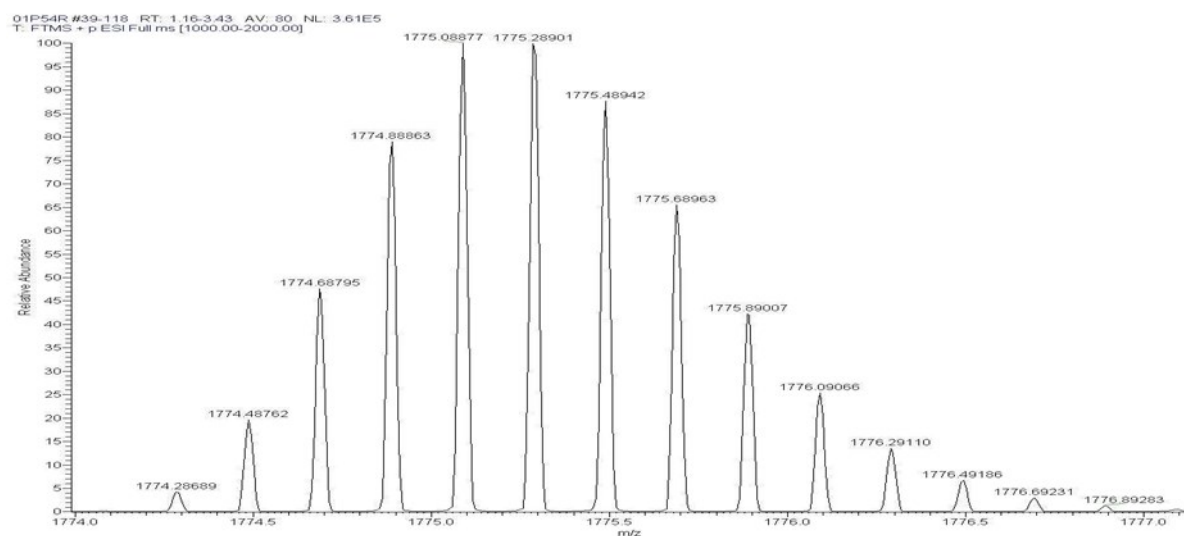

Figure S 16. HRMS spectrum of compound 13

## Compound 14

Prepared according general procedure **A** from **10** (7.9 mg, 4.6  $\mu\text{mol}$ ) and **1** (1.2 mg, 1.0  $\mu\text{mol}$ ). The crude mixture was purified to afford the title compound as a white fluffy solid after lyophilization (6.6 mg, 0.8  $\mu\text{mol}$ , 83%). HRMS (ESI<sup>+</sup>-TOF)  $m/z$ : calcd for  $\text{C}_{335}\text{H}_{537}\text{N}_{103}\text{O}_{122}$   $[\text{M}+4\text{H}]^{4+}$ : 1988.7240, found 1988.7281; RP-HPLC:  $R_t = 5.62$  min (C18,  $\lambda = 214$  nm, 5-60% B in 15 min).

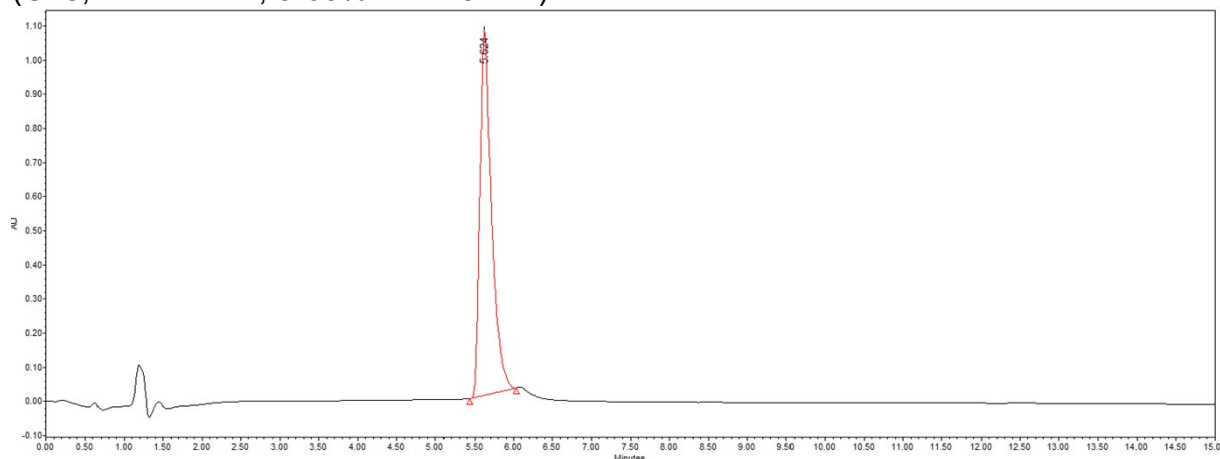

Figure S 17. RP-HPLC Spectrum of compound **14**

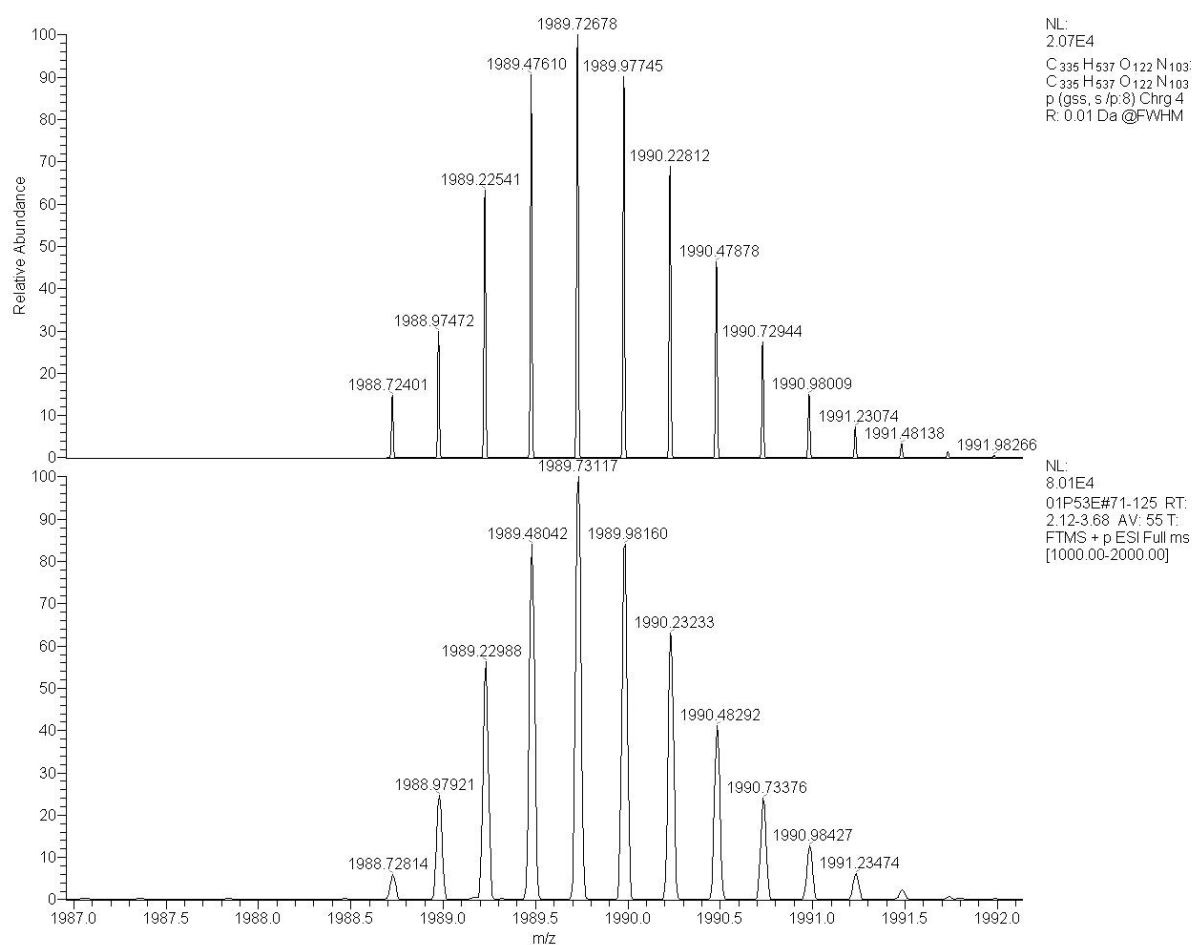

Figure S 18. HRMS spectrum of compound **14**

## Compound 15

Prepared according general procedure **A** from **10** (38.7 mg, 22.7  $\mu\text{mol}$ ) and **2** (4.2 mg, 5.1  $\mu\text{mol}$ ). The crude mixture was purified to afford the title compound as a white fluffy solid after lyophilization (29.4 mg, 3.8  $\mu\text{mol}$ , 75%). HRMS (ESI<sup>+</sup>-TOF)  $m/z$ : calcd for  $\text{C}_{319}\text{H}_{514}\text{N}_{100}\text{O}_{119}$   $[\text{M}+4\text{H}]^{4+}$ : 1912.4305, found 1912.4374; RP-HPLC:  $R_t = 5.41$  min (C18,  $\lambda = 214$  nm, 5-60% B in 15 min).

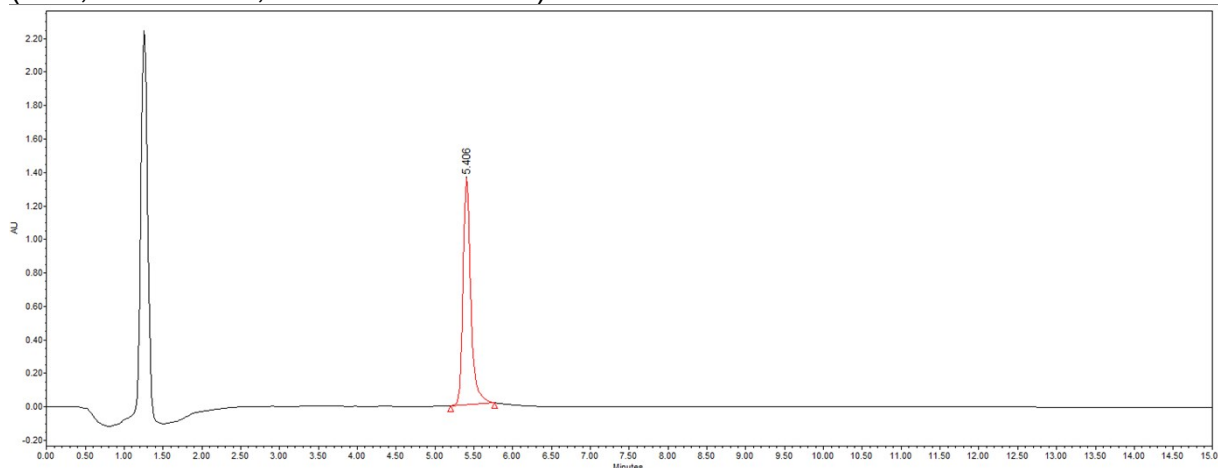

Figure S 19. RP-HPLC Spectrum of compound **15**

01P54V\_190926153000

9/26/2019 3:44:53 PM

BTO-281

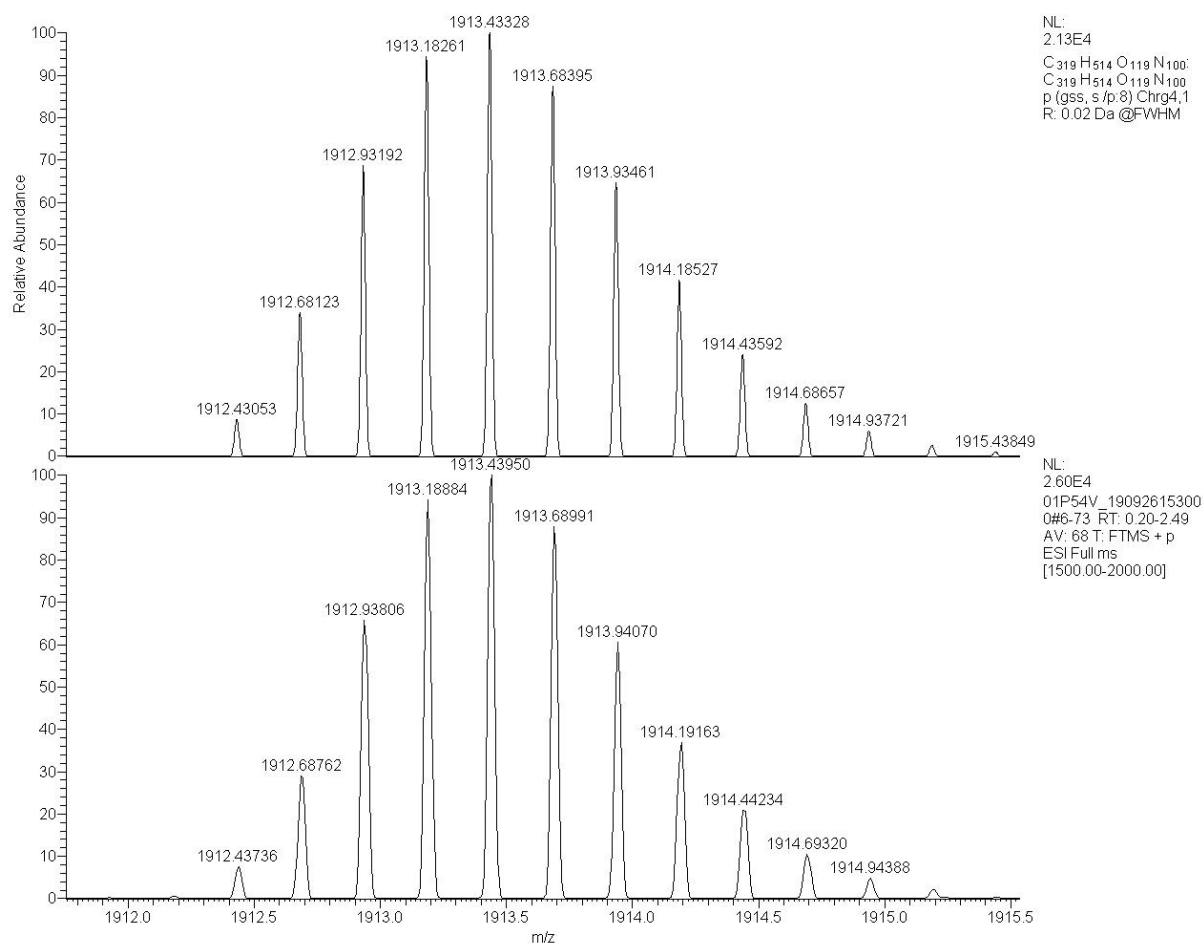

Figure S 20. HRMS spectrum of compound **15**

## Compound **16**

Prepared according already described procedure. Analyses were in agreement with the literature.<sup>2</sup>

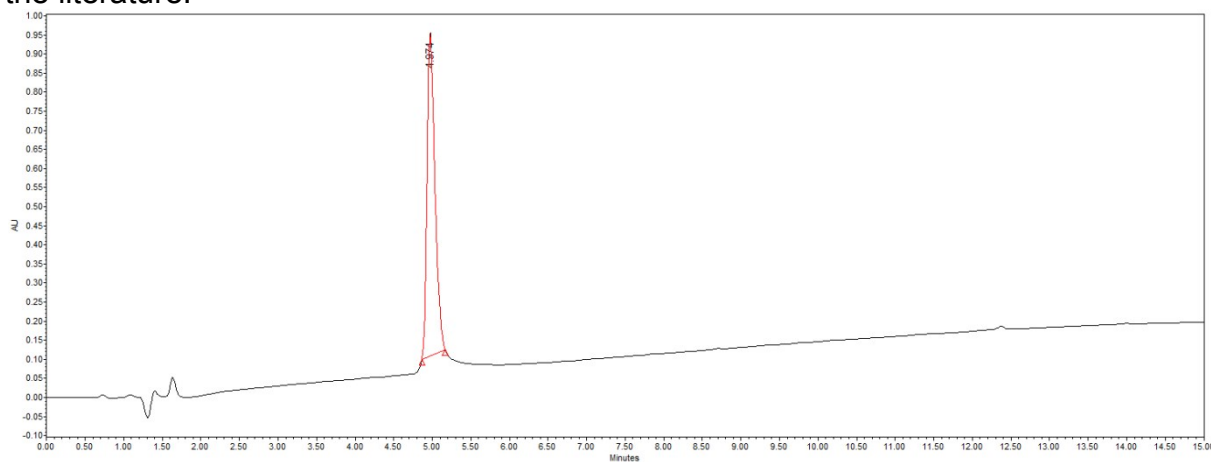

Figure S 21. RP-HPLC Spectrum of compound **16**

## Compound 17

Prepared according general procedure **C** from **13** (21.5 mg, 2.4  $\mu\text{mol}$ ) and azidoacetic acid succinimide ester (1.0 mg, 4.8  $\mu\text{mol}$ ). The crude mixture was purified to afford the title compound as a white fluffy solid after lyophilization (19.4 mg, 2.1  $\mu\text{mol}$ , 88%). HRMS (ESI<sup>+</sup>-TOF)  $m/z$ : calcd for C<sub>385</sub>H<sub>603</sub>N<sub>115</sub>O<sub>132</sub> [M+5H]<sup>5+</sup>: 1791.6896, found 1791.6916; RP-HPLC: R<sub>t</sub> = 7.57 min (C18,  $\lambda$  = 214 nm, 5-60% B in 15 min).

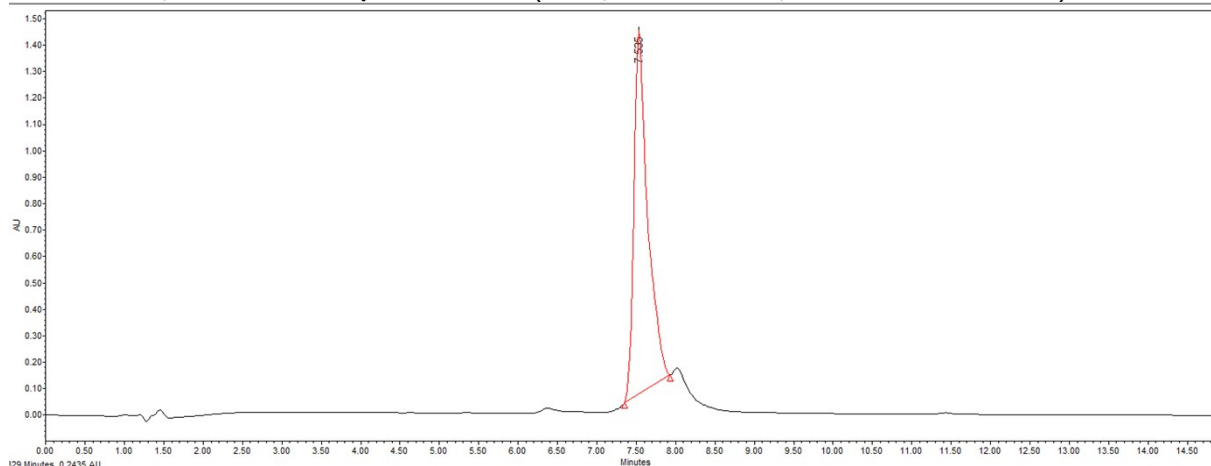

Figure S 22. RP-HPLC Spectrum of compound **17**

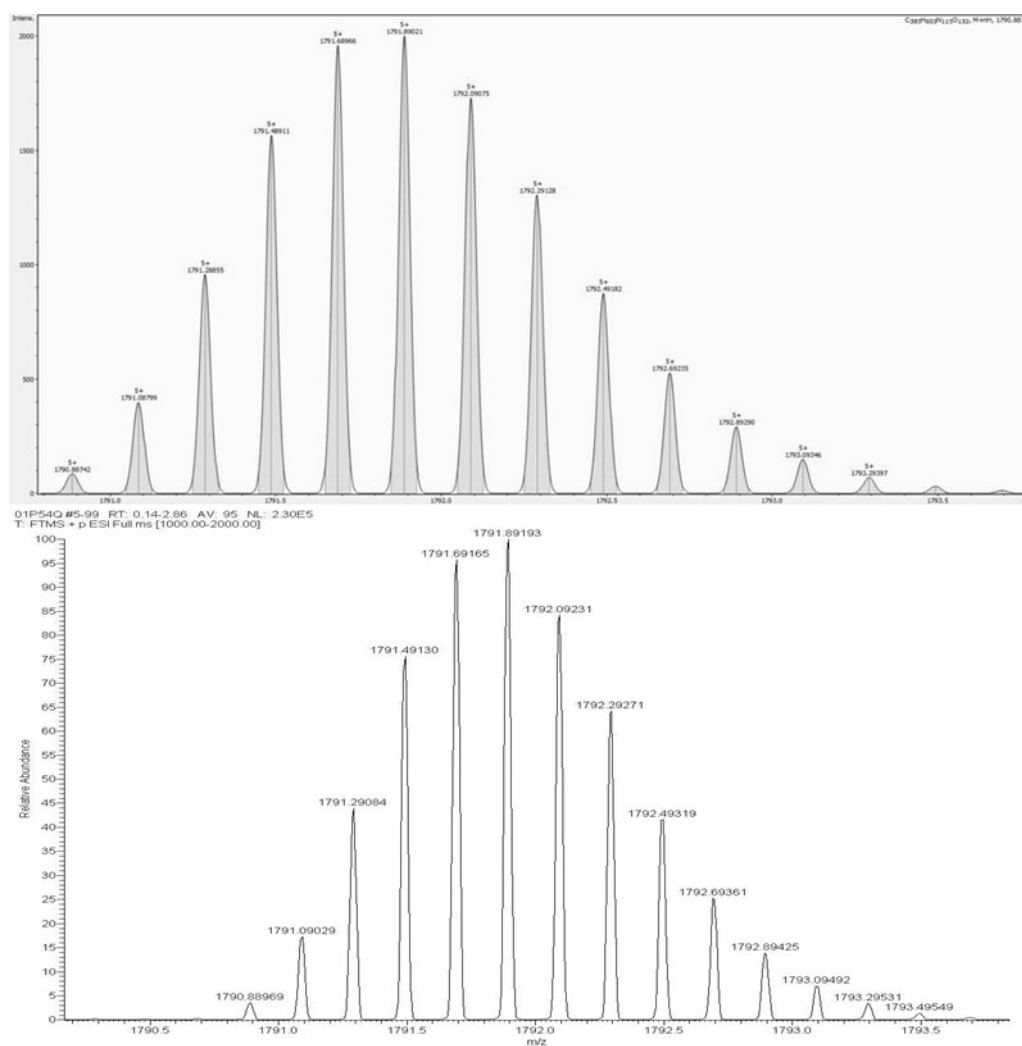

Figure S 23. HRMS spectrum of compound **17**

## Compound 18

Prepared according general procedure **C** from **14** (21.5 mg, 2.7  $\mu\text{mol}$ ) and azidoacetic acid succinimide ester (0.8 mg, 4.0  $\mu\text{mol}$ ). The crude mixture was purified to afford the title compound as a white fluffy solid after lyophilization (19.1 mg, 2.4  $\mu\text{mol}$ , 88%). HRMS (ESI<sup>+</sup>-TOF)  $m/z$ : calcd for  $\text{C}_{337}\text{H}_{534}\text{N}_{106}\text{O}_{123}$   $[\text{M}+5\text{H}]^{5+}$ : 1608.5852, found 1608.5903; RP-HPLC:  $R_t = 4.35$  min (C18,  $\lambda = 214$  nm, 5-100% B in 15 min).

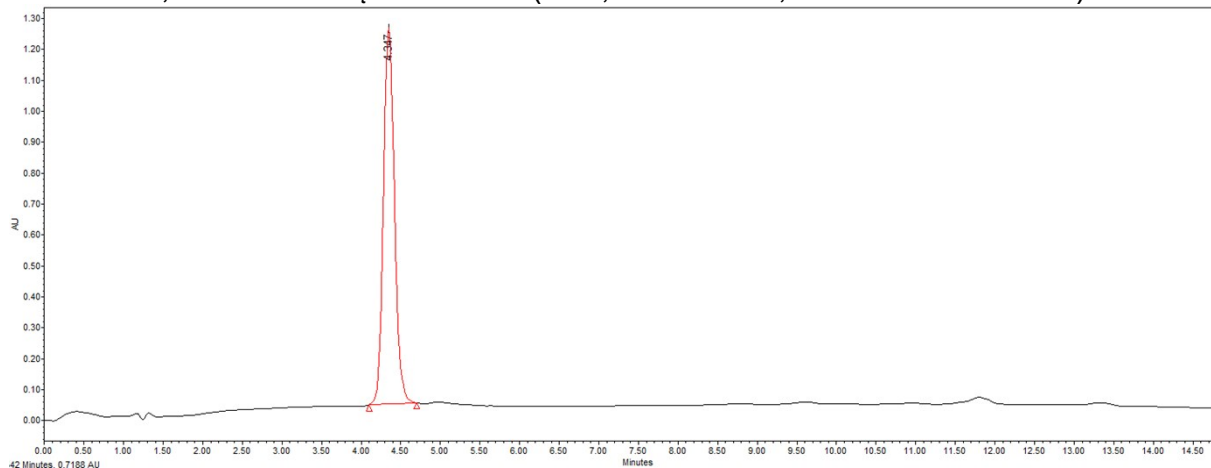

Figure S 24. RP-HPLC Spectrum of compound **18**

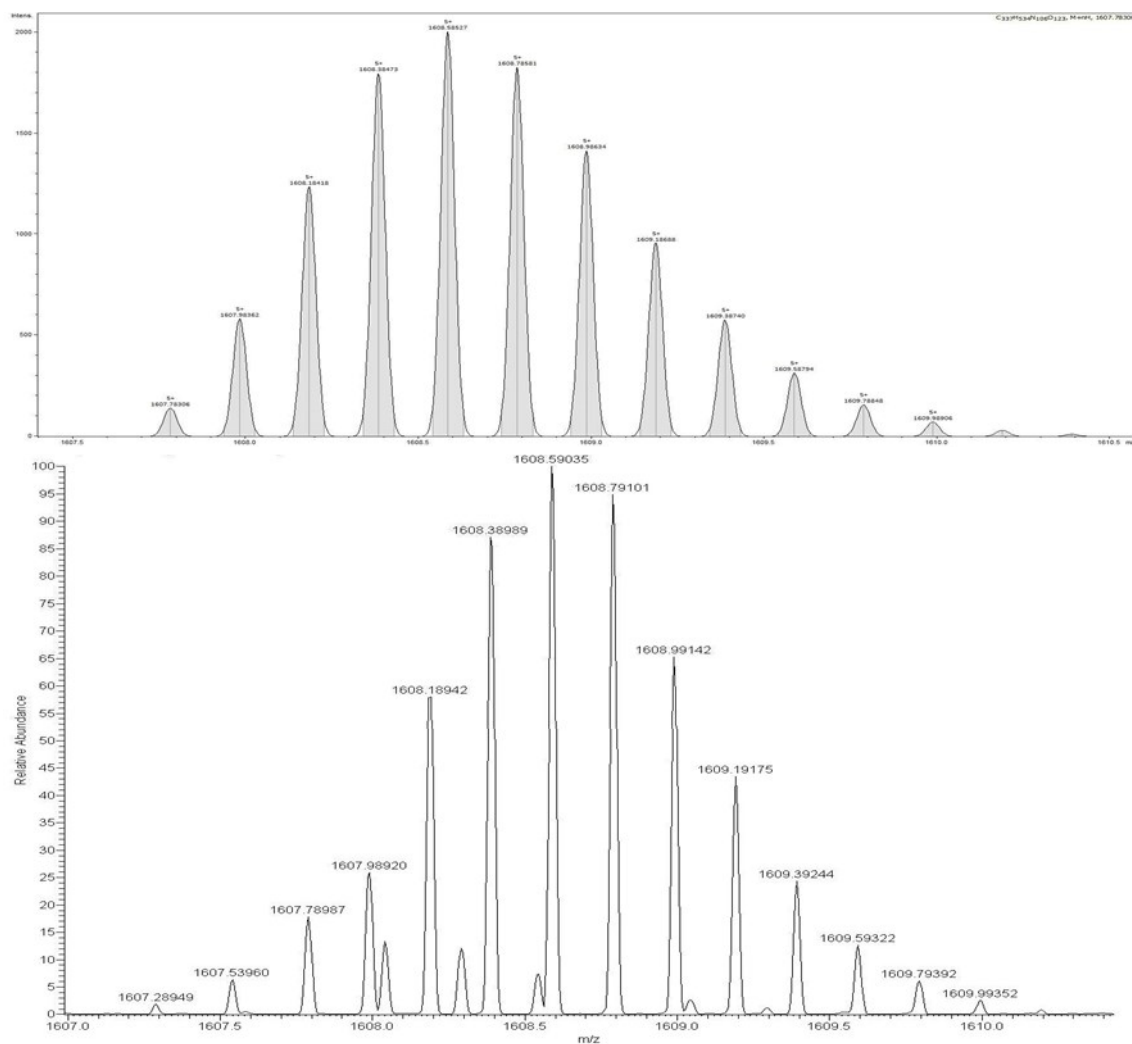

Figure S 25. HRMS spectrum of compound **18**

## Compound 19

Prepared according general procedure **C** from **15** (39.2 mg, 5.1  $\mu\text{mol}$ ) and azidoacetic acid succinimide ester (1.5 mg, 7.7  $\mu\text{mol}$ ). The crude mixture was purified to afford the title compound as a white fluffy solid after lyophilization (38.0 mg, 4.9  $\mu\text{mol}$ , 96%). HRMS (ESI<sup>+</sup>-TOF)  $m/z$ : calcd for  $\text{C}_{321}\text{H}_{515}\text{N}_{103}\text{O}_{120}$   $[\text{M}+4\text{H}]^{4+}$ : 1933.1835, found 1933.1879; RP-HPLC:  $R_t = 4.11$  min (C18,  $\lambda = 214$  nm, 5-100% B in 15 min).

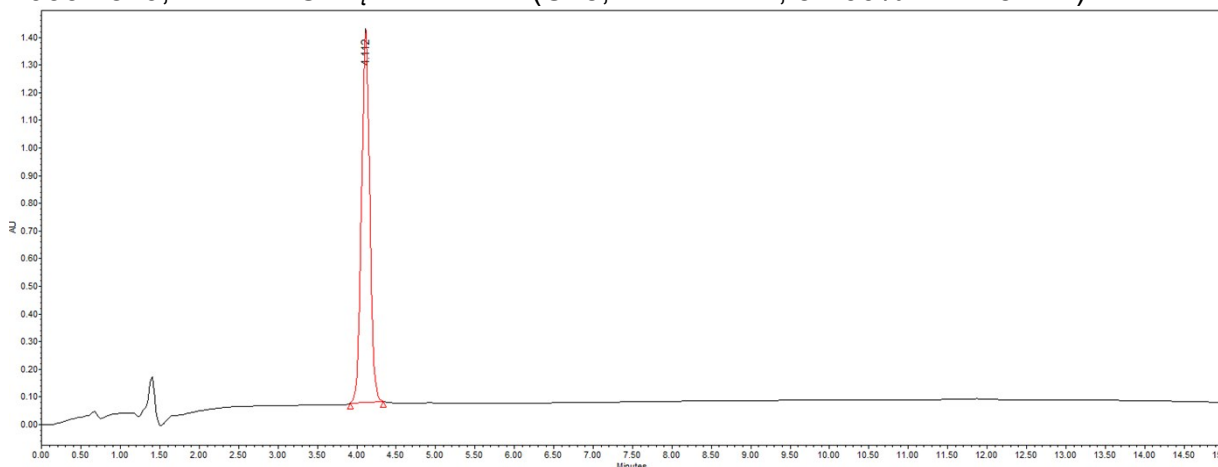

Figure S 26. RP-HPLC Spectrum of compound **19**

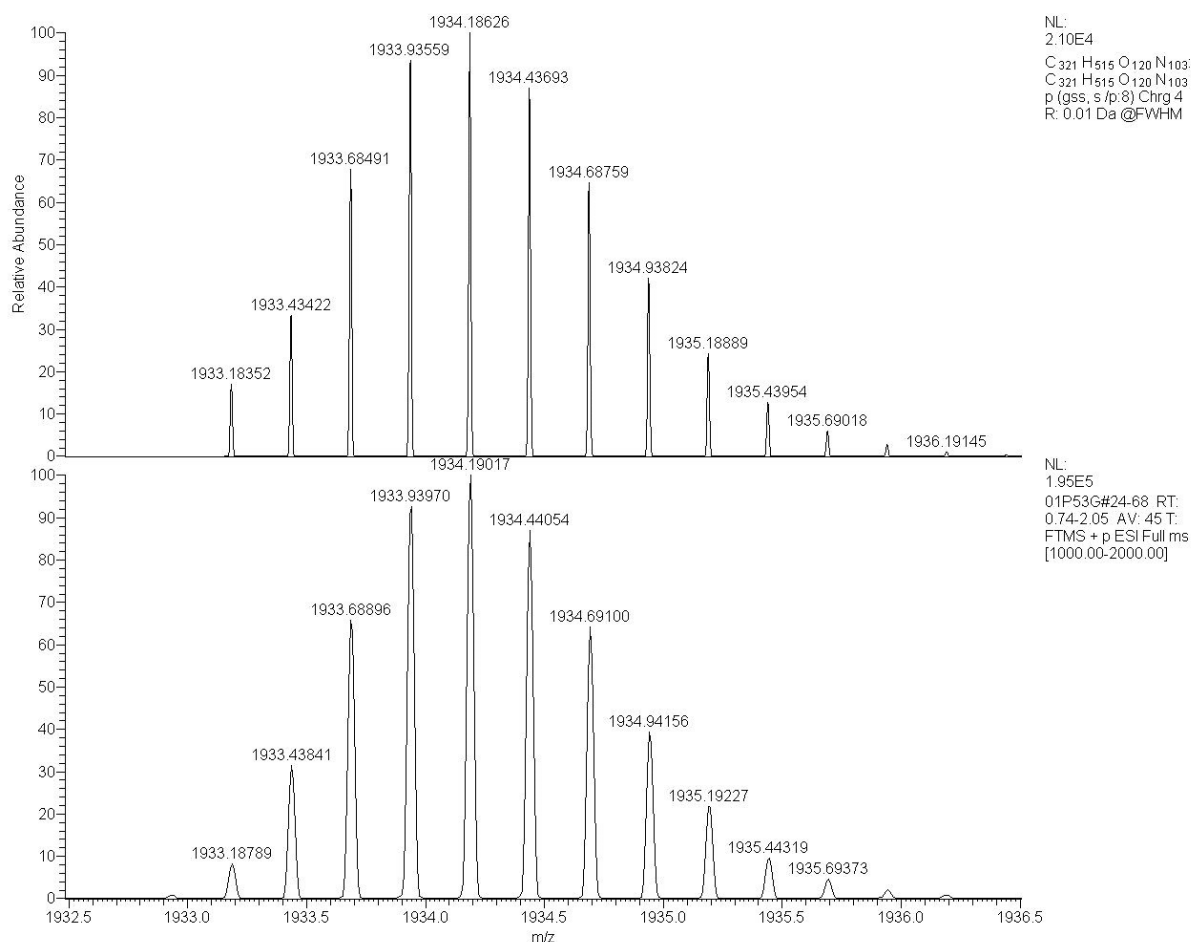

Figure S 27. HRMS spectrum of compound **19**



## Compound **20**

Prepared according general procedure **D** from **12** (7.0 mg, 0.7  $\mu\text{mol}$ ) and 2-[2-(2-Azidoethoxy)ethoxy]-acetic acid potassium salt (0.3 mg, 9.5  $\mu\text{mol}$ ) and PyBoP (0.8 mg, 1.5  $\mu\text{mol}$ ). The crude mixture was purified to afford the title compound as a white fluffy solid after lyophilization (6.1 mg, 0.6  $\mu\text{mol}$ , 92%). HRMS (ESI<sup>+</sup>-TOF)  $m/z$ : calcd for  $\text{C}_{405}\text{H}_{639}\text{N}_{118}\text{O}_{137}$   $[\text{M}+5\text{H}]^{5+}$ : 1869.5327, found 1869.5446; RP-HPLC:  $R_t = 7.10$  min (C18,  $\lambda = 214$  nm, 5-60% B in 15 min).

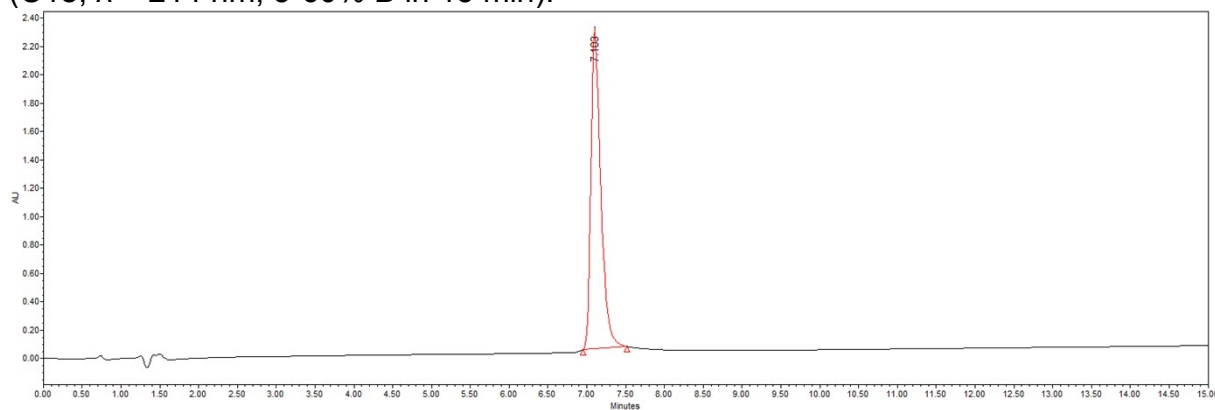

Figure S 28. RP-HPLC Spectrum of compound **20**

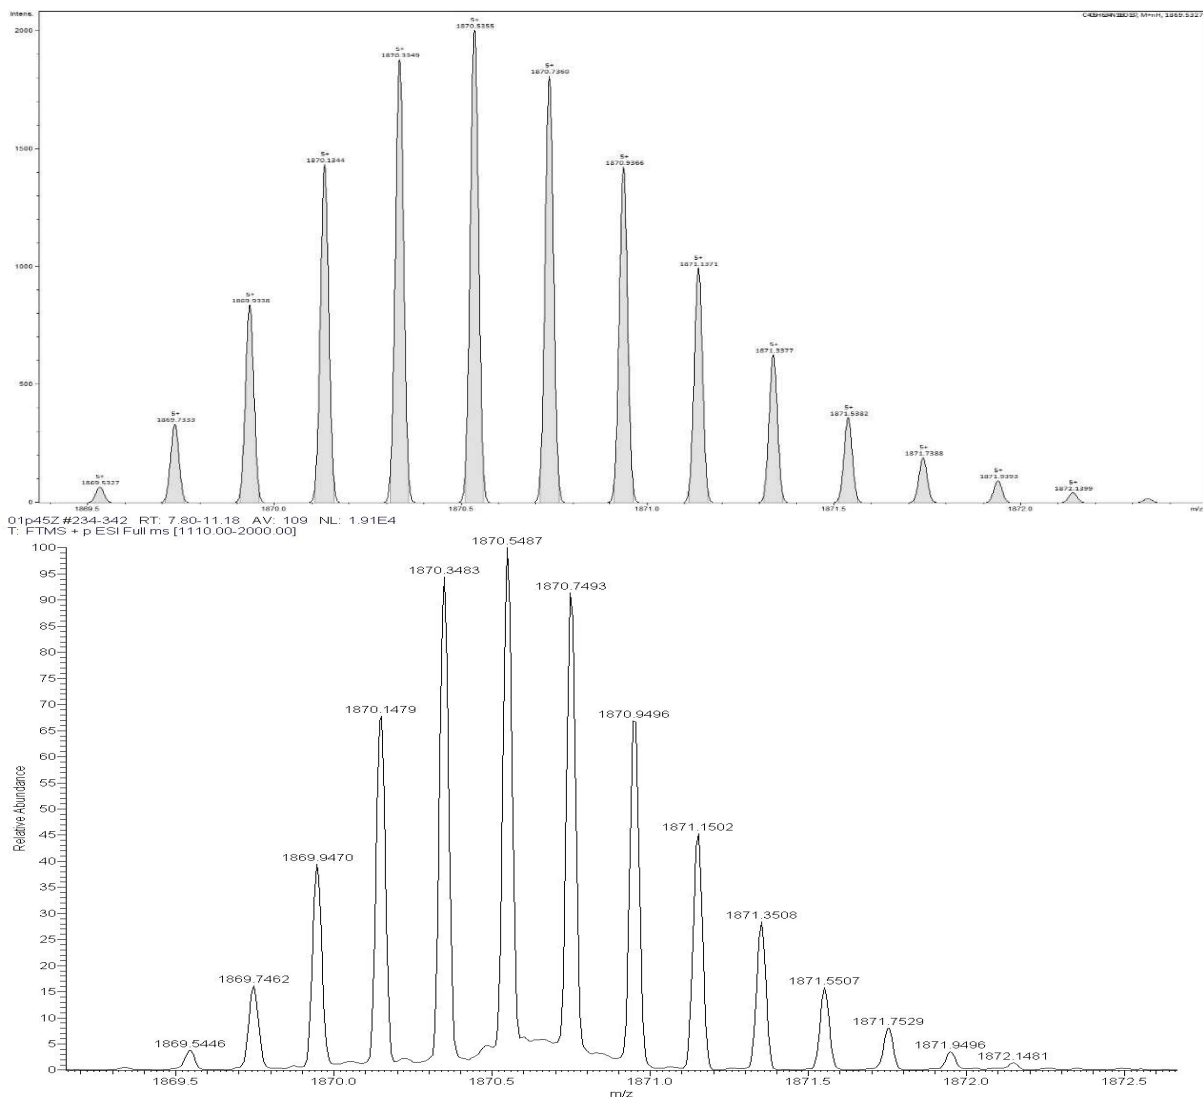

Figure S 29. HRMS spectrum of compound **20**

**Compound 4C**

Prepared according already described procedure. Analyses were in agreement with the literature.<sup>2</sup>

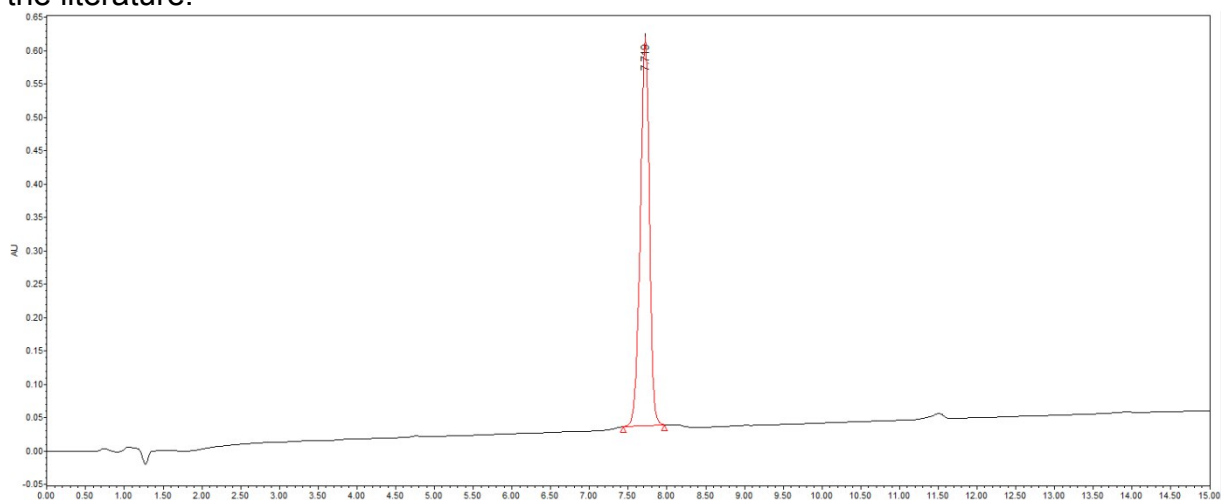

Figure S 30. RP-HPLC Spectrum of compound **4C**

## Compound **16CC**

Prepared according already described procedure. Analyses were in agreement with the literature.<sup>2</sup>

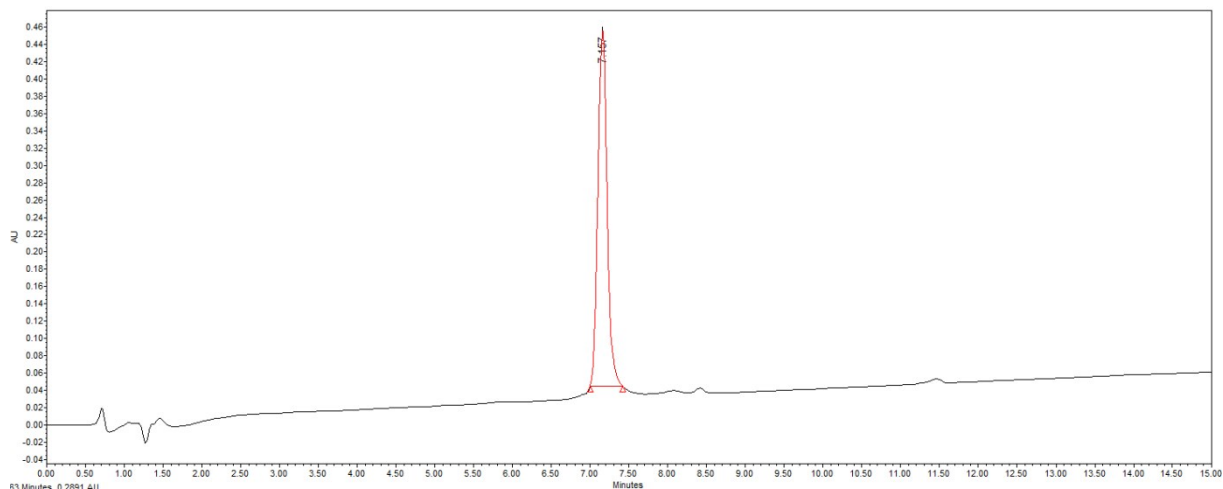

Figure S 31. RP-HPLC Spectrum of compound **16CC**

## Compound **16DC**

Prepared according general procedure **E** from **20** (8.1 mg, 0.9  $\mu\text{mol}$ ) and **10** (3.6 mg, 0.9  $\mu\text{mol}$ ). The crude mixture was purified to afford the title compound as a white fluffy solid after lyophilization (8.0 mg, 0.6  $\mu\text{mol}$ , 69%). MALDI-ToF  $m/z$ : calcd for  $\text{C}_{565}\text{H}_{865}\text{N}_{174}\text{O}_{175}$   $[\text{M}+\text{H}]^+$ : 12887.4057, found 12887.3170; RP-HPLC:  $R_t = 7.53$  min (C18,  $\lambda = 214$  nm, 5-60% B in 15 min).

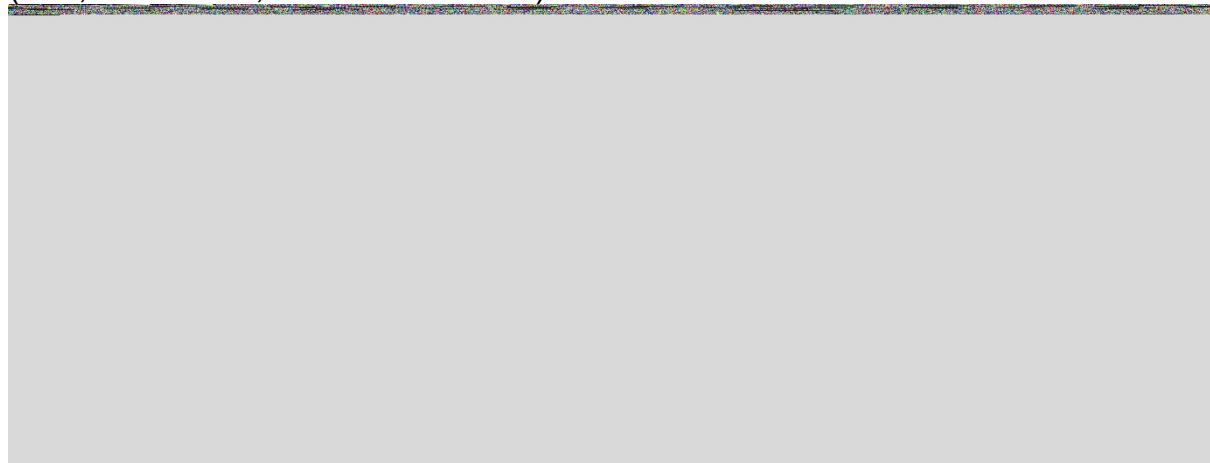

Figure S 32. RP-HPLC Spectrum of compound **16DC**

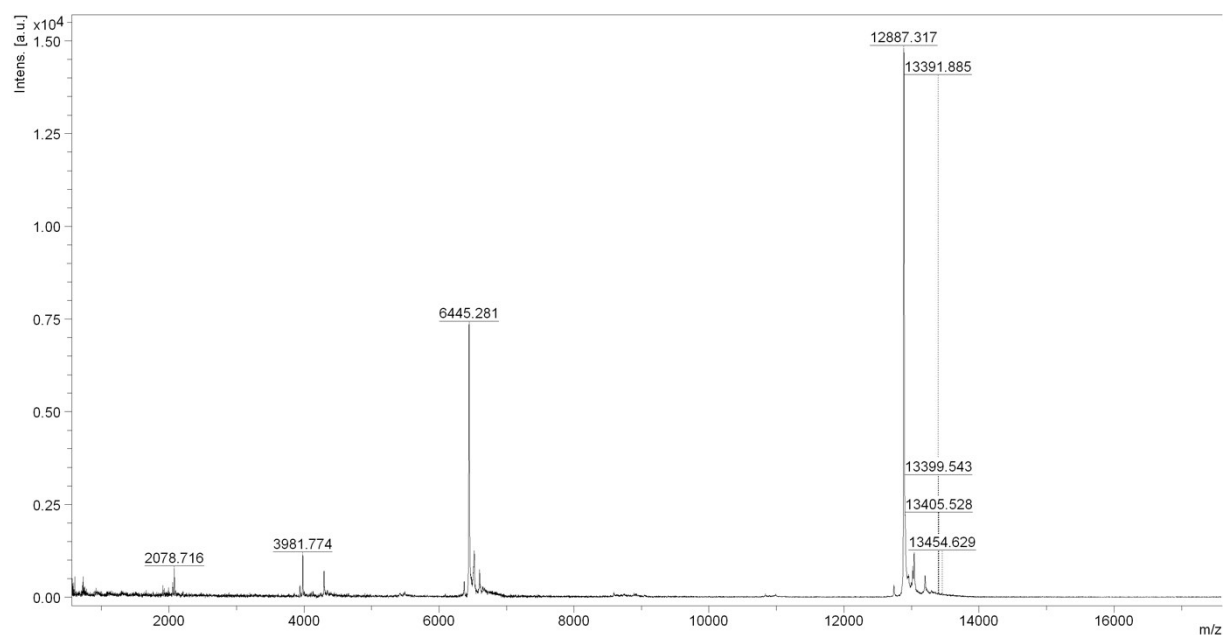

Figure S 33. Maldi-ToF spectrum of compound **16DC**

## Compound **16CD**

Prepared according general procedure **E** from **22** (2.4 mg, 0.3  $\mu\text{mol}$ ) and **10** (1.2 mg, 0.3  $\mu\text{mol}$ ). The crude mixture was purified to afford the title compound as a white fluffy solid after lyophilization (2.0 mg, 0.16  $\mu\text{mol}$ , 56%). HRMS (ESI<sup>+</sup>-TOF)  $m/z$ : calcd for  $\text{C}_{517}\text{H}_{795}\text{N}_{165}\text{O}_{166}$   $[\text{M}+6\text{H}]^{6+}$ : 1996.9902, found 1996.9913; RP-HPLC:  $R_t = 5.30$  min (C18,  $\lambda = 214$  nm, 5-100% B in 15 min).

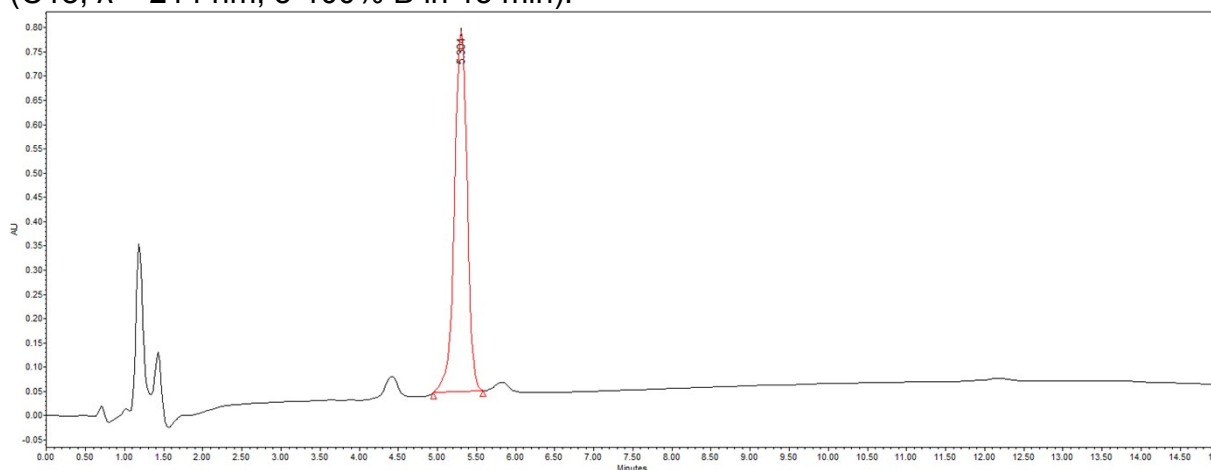

Figure S 34. RP-HPLC Spectrum of compound **16CD**

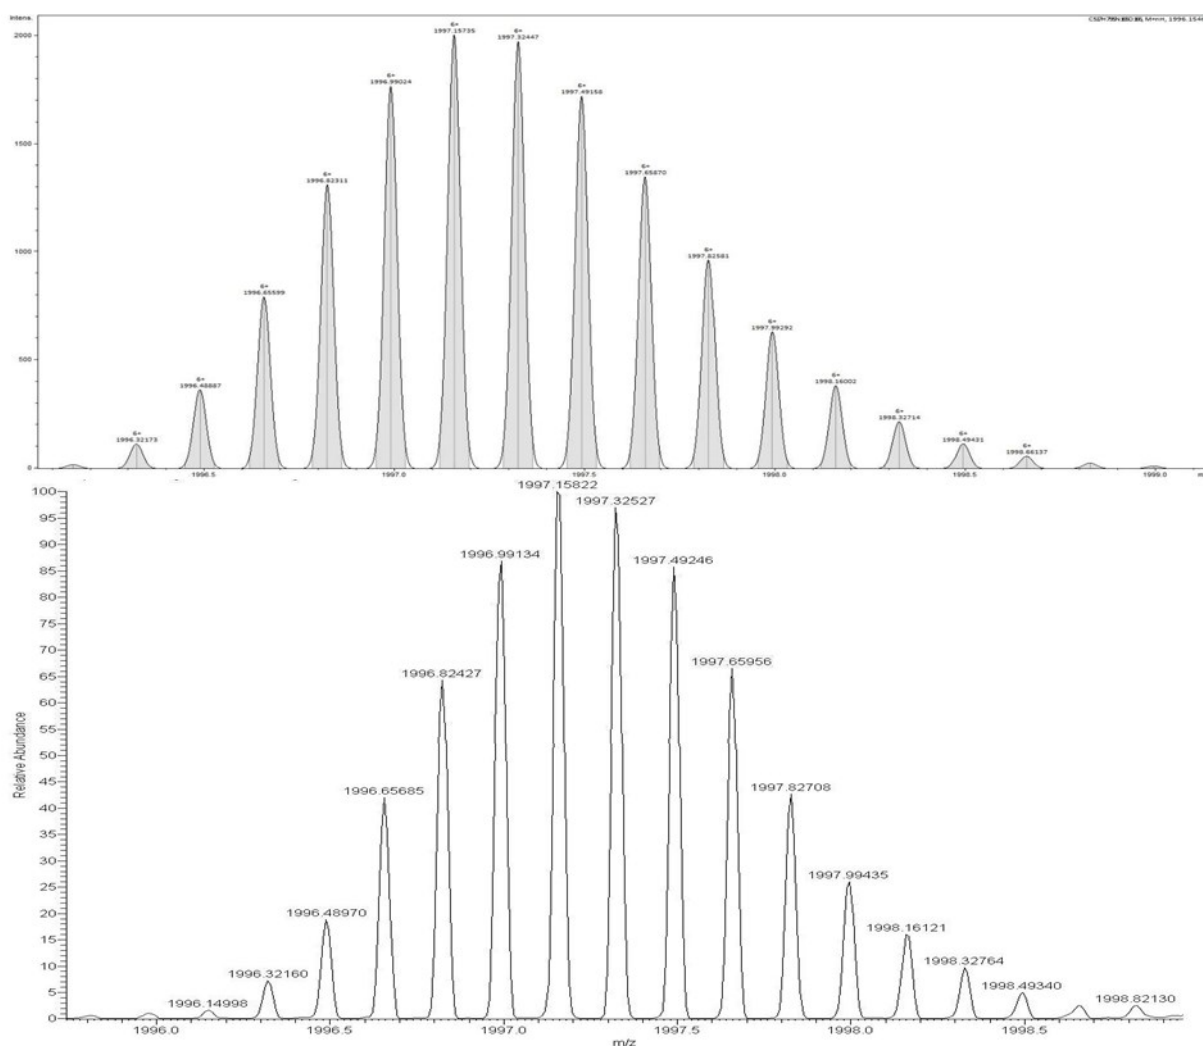

Figure S 35. HRMS spectrum of compound **16CD**

## Compound **16DD**

Prepared according general procedure **E** from **24** (3.5 mg, 0.45  $\mu\text{mol}$ ) and **10** (1.8 mg, 0.45  $\mu\text{mol}$ ). The crude mixture was purified to afford the title compound as a white fluffy solid after lyophilization (4.1 mg, 0.35  $\mu\text{mol}$ , 78%). HRMS (ESI<sup>+</sup>-TOF)  $m/z$ : calcd for  $\text{C}_{501}\text{H}_{772}\text{N}_{162}\text{O}_{163}$   $[\text{M}+6\text{H}]^{6+}$ : 1946.1279, found 1946.1286; RP-HPLC:  $R_t = 5.31$  min (C18,  $\lambda = 214$  nm, 5-100% B in 15 min).

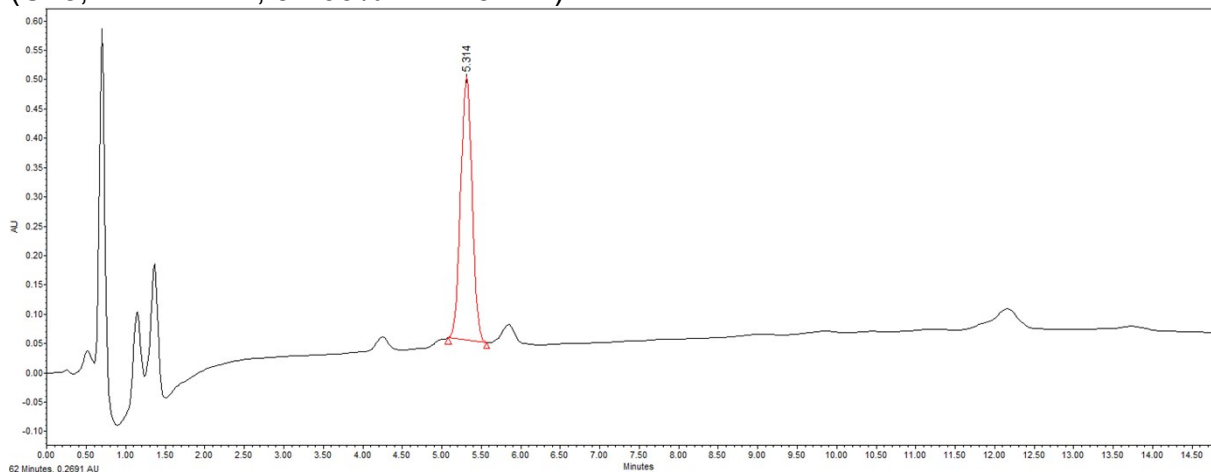

Figure S 36. RP-HPLC Spectrum of compound **16DD**

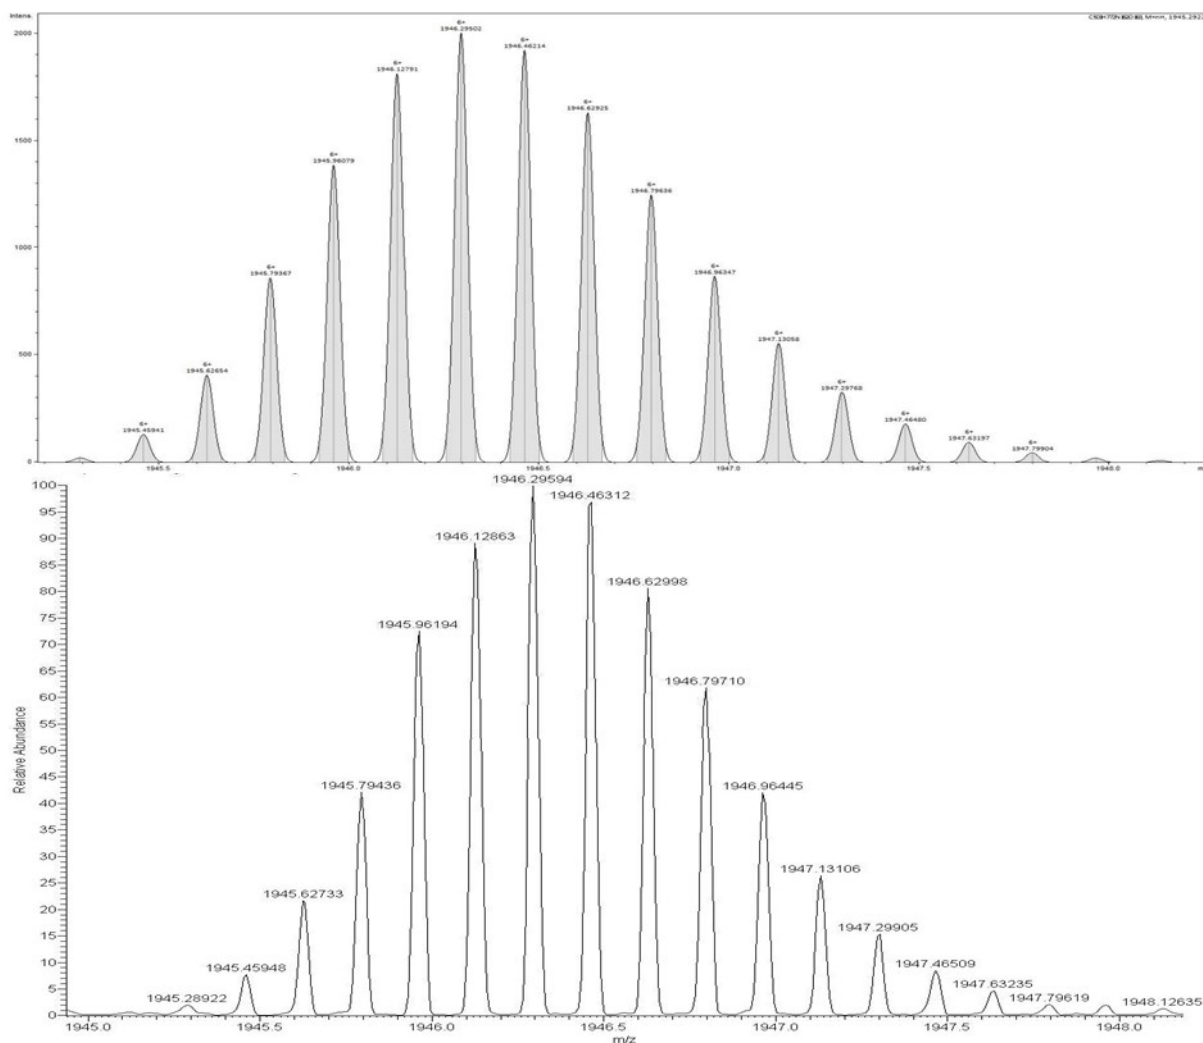

Figure S 37. HRMS spectrum of compound **16DD**

## Compound **4C-P**

Prepared according general procedure **E** from **7** (4.1 mg, 1.9  $\mu\text{mol}$ ) and **10** (7.7 mg, 1.9  $\mu\text{mol}$ ). The crude mixture was purified to afford the title compound as a white fluffy solid after lyophilization (10 mg, 1.6  $\mu\text{mol}$ , 87%). HRMS (ESI<sup>+</sup>-TOF)  $m/z$ : calcd for  $\text{C}_{269}\text{H}_{407}\text{N}_{85}\text{O}_{76}$   $[\text{M}+4\text{H}]^{4+}$ : 1511.0143, found 1511.0284; RP-HPLC:  $R_t = 5.49$  min (C18,  $\lambda = 214$  nm, 5-100% B in 15 min).

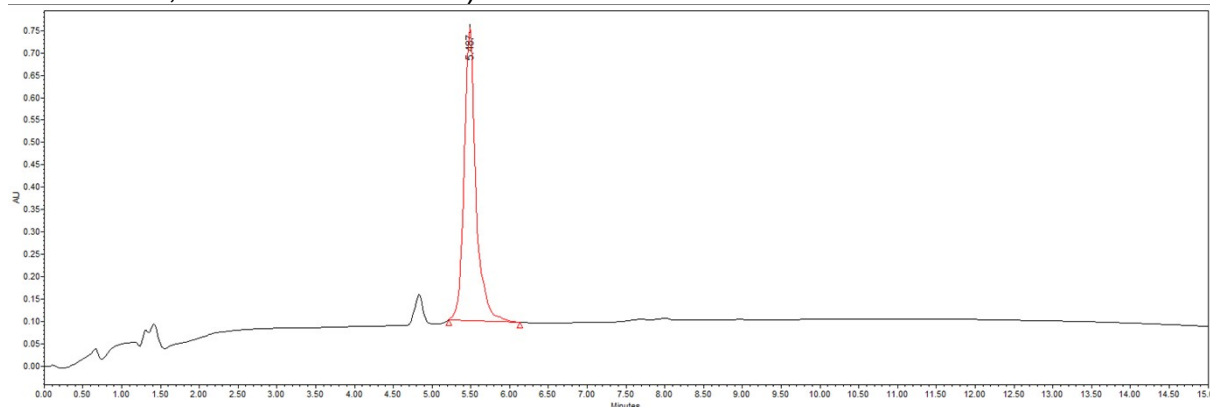

Figure S 38. RP-HPLC Spectrum of compound **4C-P**

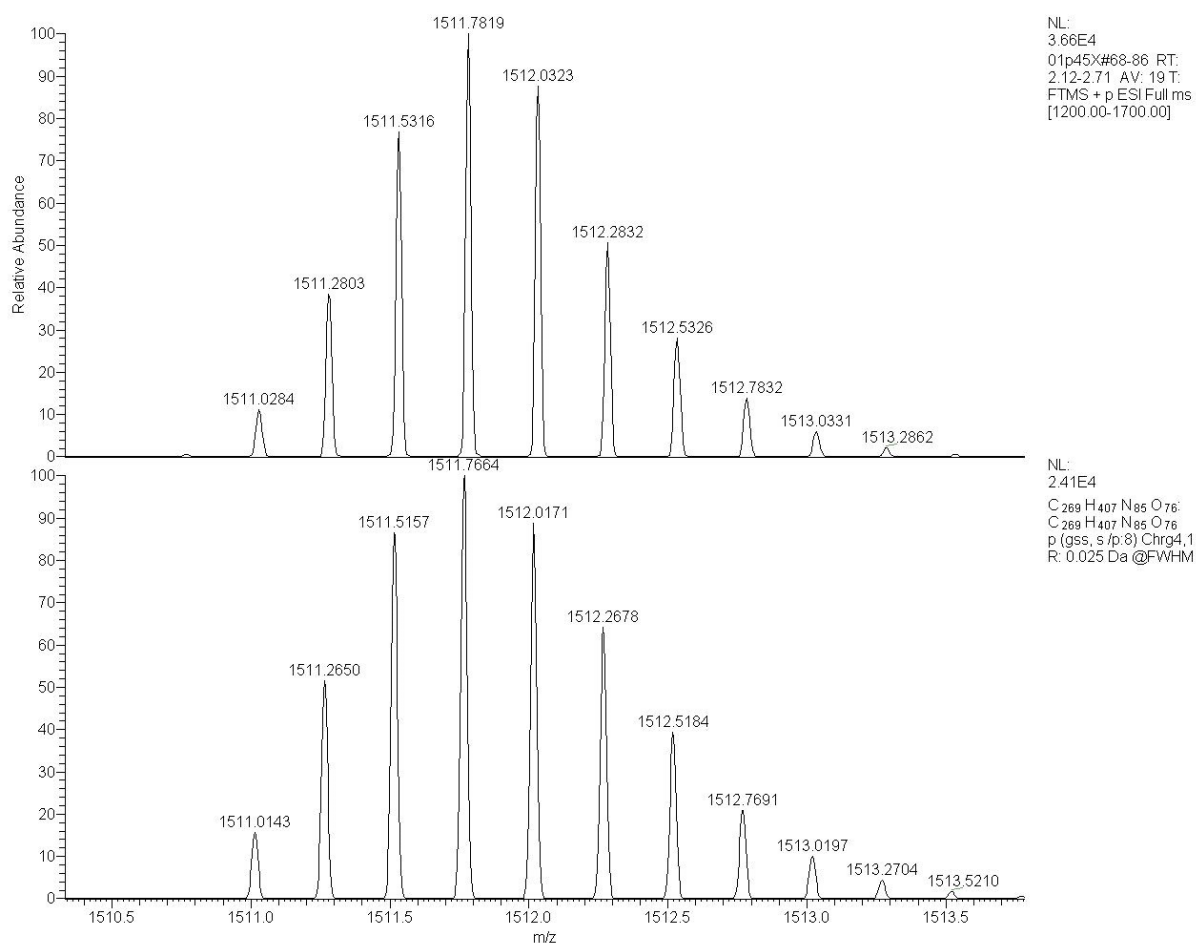

Figure S 39. HRMS spectrum of compound **4C-P**

## Compound **16CC-P**

Prepared according general procedure **E** from **18** (5.2 mg, 0.5  $\mu\text{mol}$ ) and **10** (2.2 mg, 0.5  $\mu\text{mol}$ ). The crude mixture was purified to afford the title compound as a white fluffy solid after lyophilization (5.1 mg, 0.38  $\mu\text{mol}$ , 77%). HRMS (ESI<sup>+</sup>-TOF)  $m/z$ : calcd for  $\text{C}_{585}\text{H}_{895}\text{N}_{177}\text{O}_{180}$   $[\text{M}+7\text{H}]^{7+}$ : 1898.9571, found 1898.9592; RP-HPLC:  $R_t = 5.30$  min (C18,  $\lambda = 214$  nm, 5-100% B in 15 min).

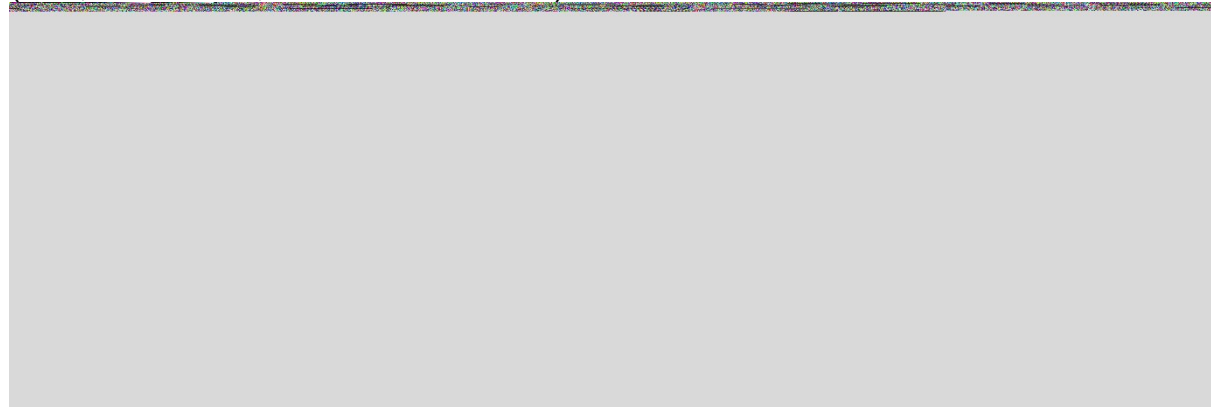

Figure S 40. RP-HPLC Spectrum of compound **16CC-P**

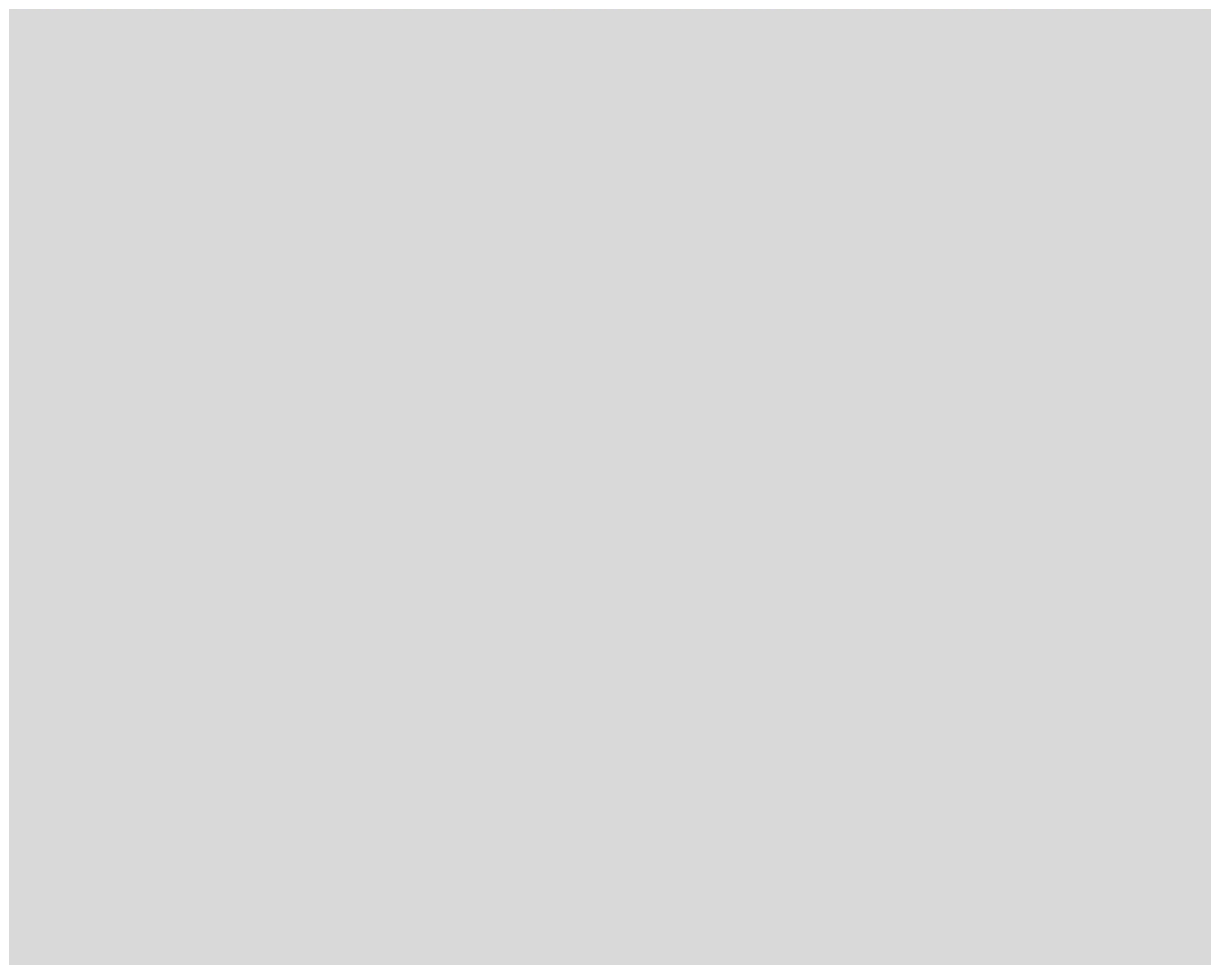

Figure S 41. HRMS spectrum of compound **16CC-P**



## NMR spectra of final compounds

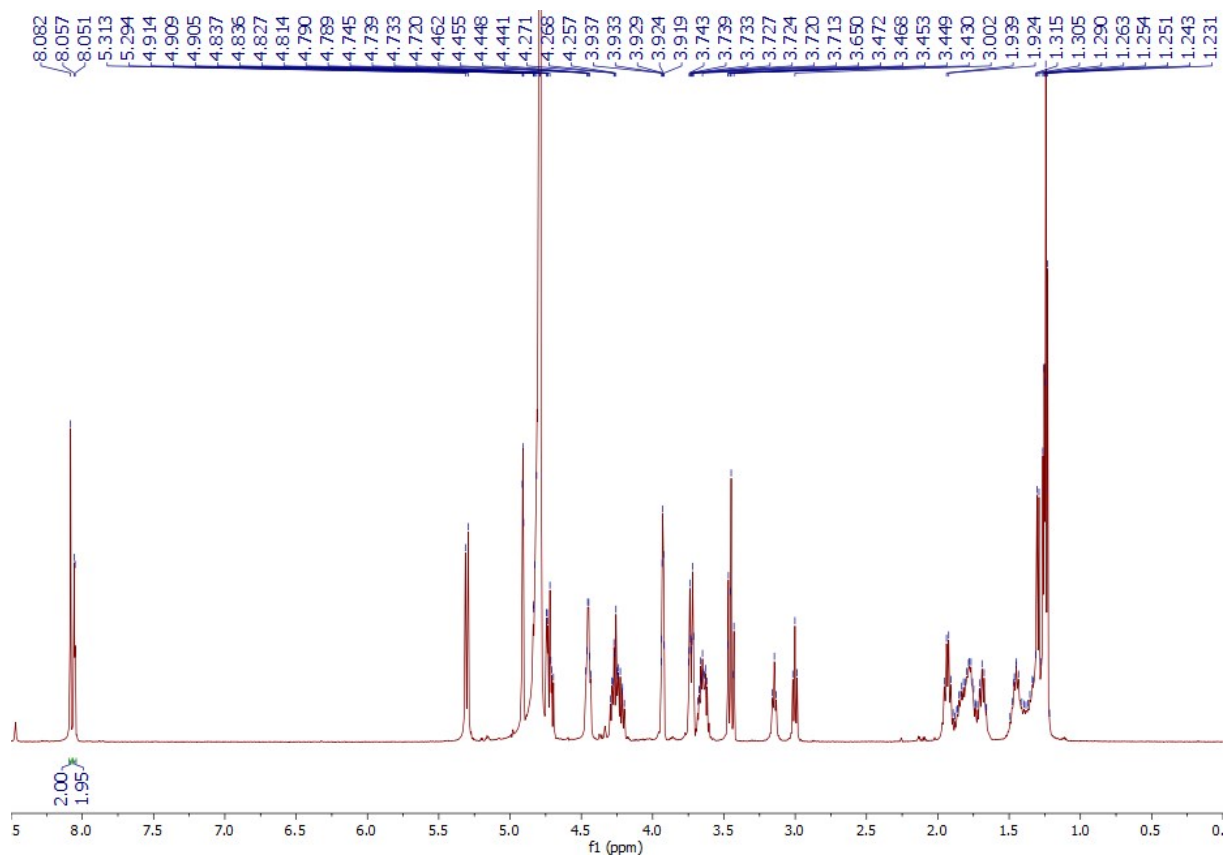

Figure S 42.  $^1\text{H}$  NMR ( $\text{D}_2\text{O}$ , 500 MHz) spectrum of compound **5**

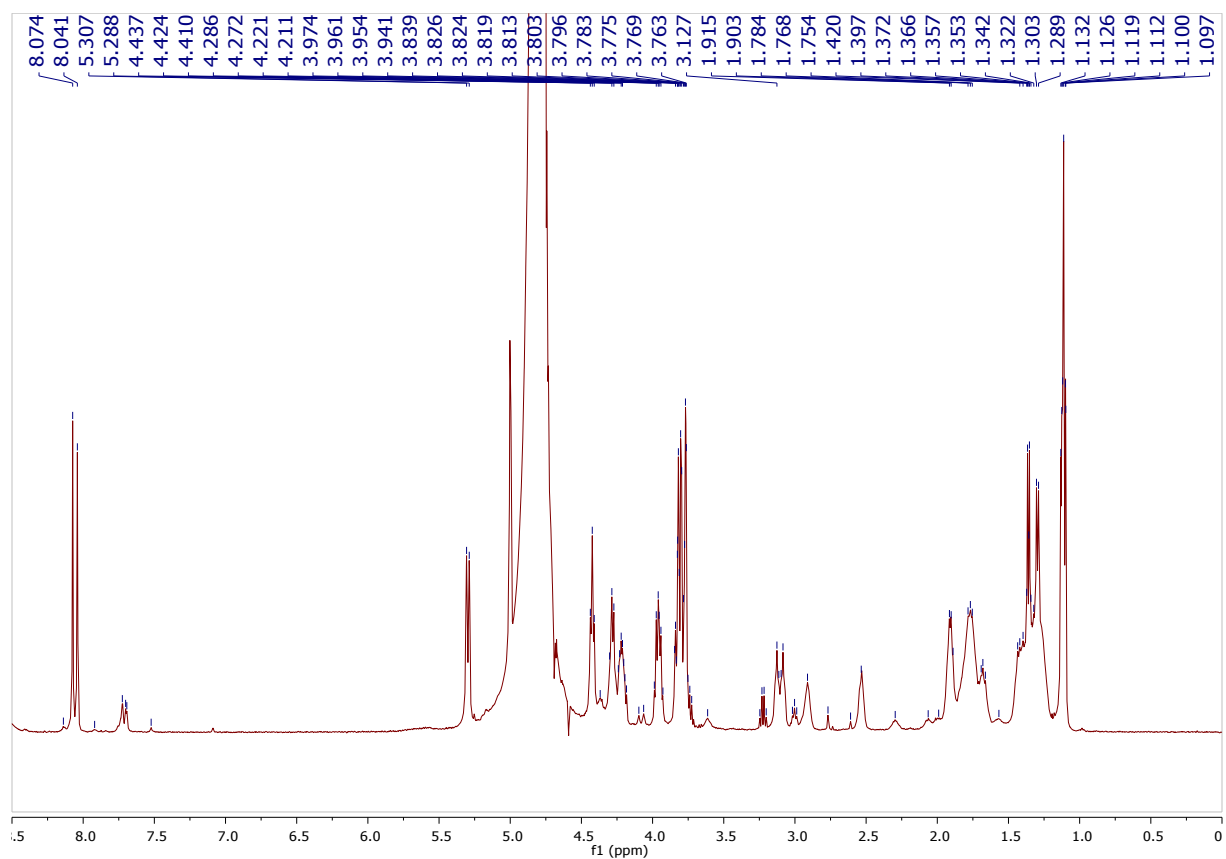

Figure S 43.  $^1\text{H}$  NMR ( $\text{D}_2\text{O}$ , 500 MHz) spectrum of compound **12**

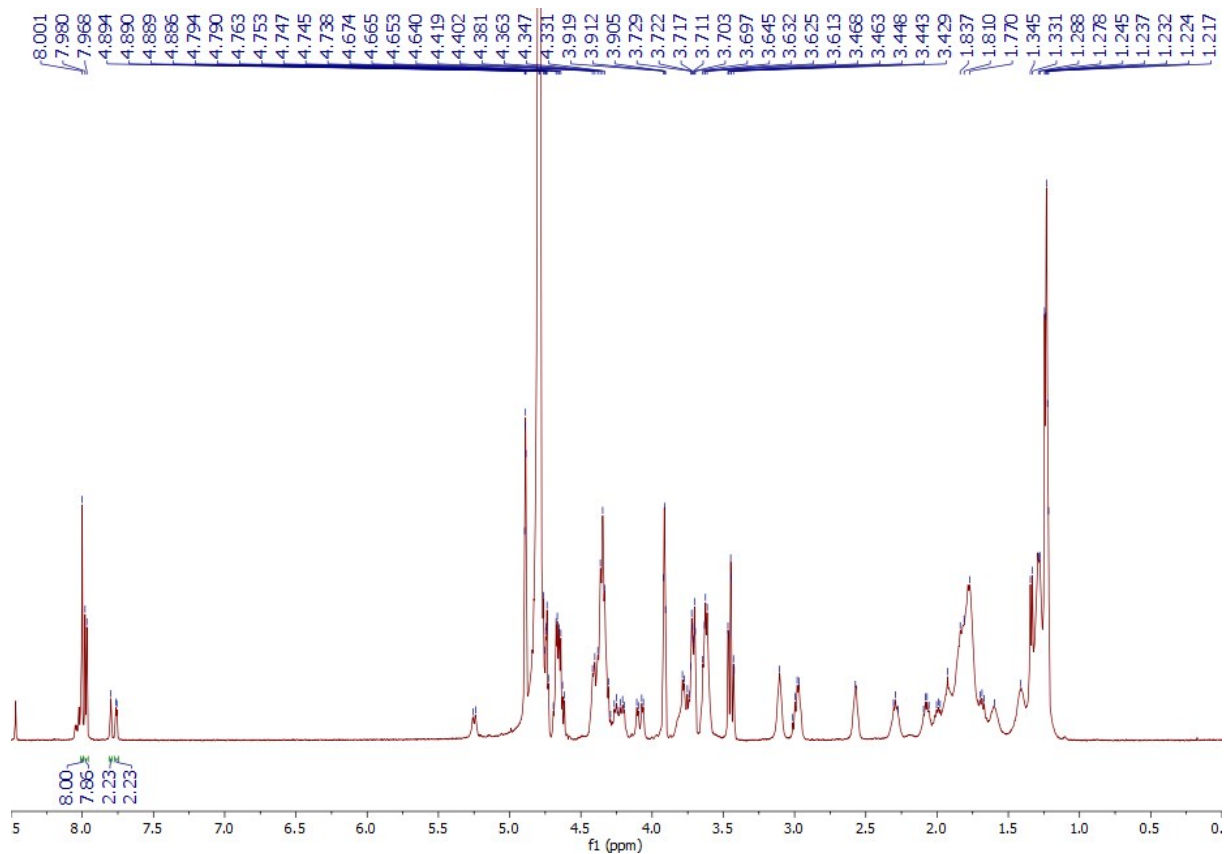

Figure S 44.  $^1\text{H}$  NMR ( $\text{D}_2\text{O}$ , 500 MHz) spectrum of compound **13**

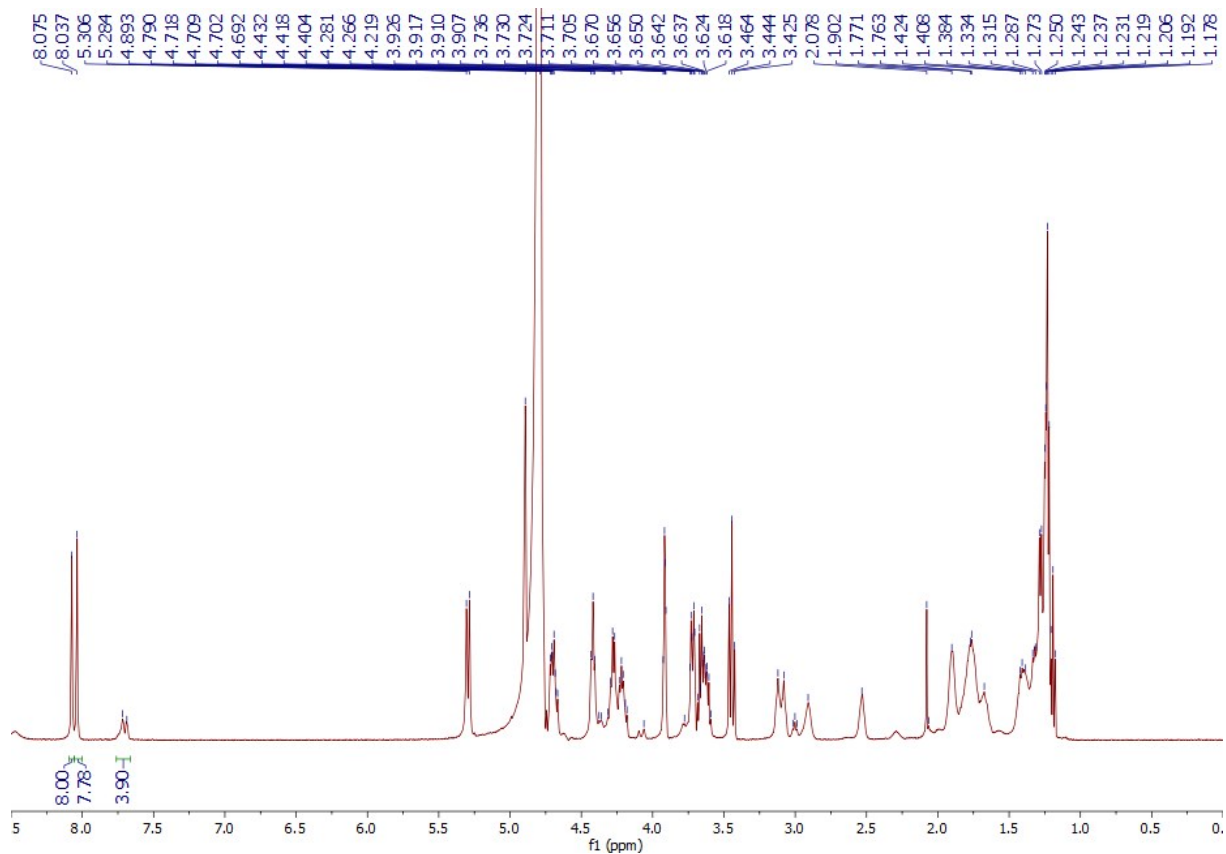

Figure S 45.  $^1\text{H}$  NMR ( $\text{D}_2\text{O}$ , 500 MHz) spectrum of compound **14**

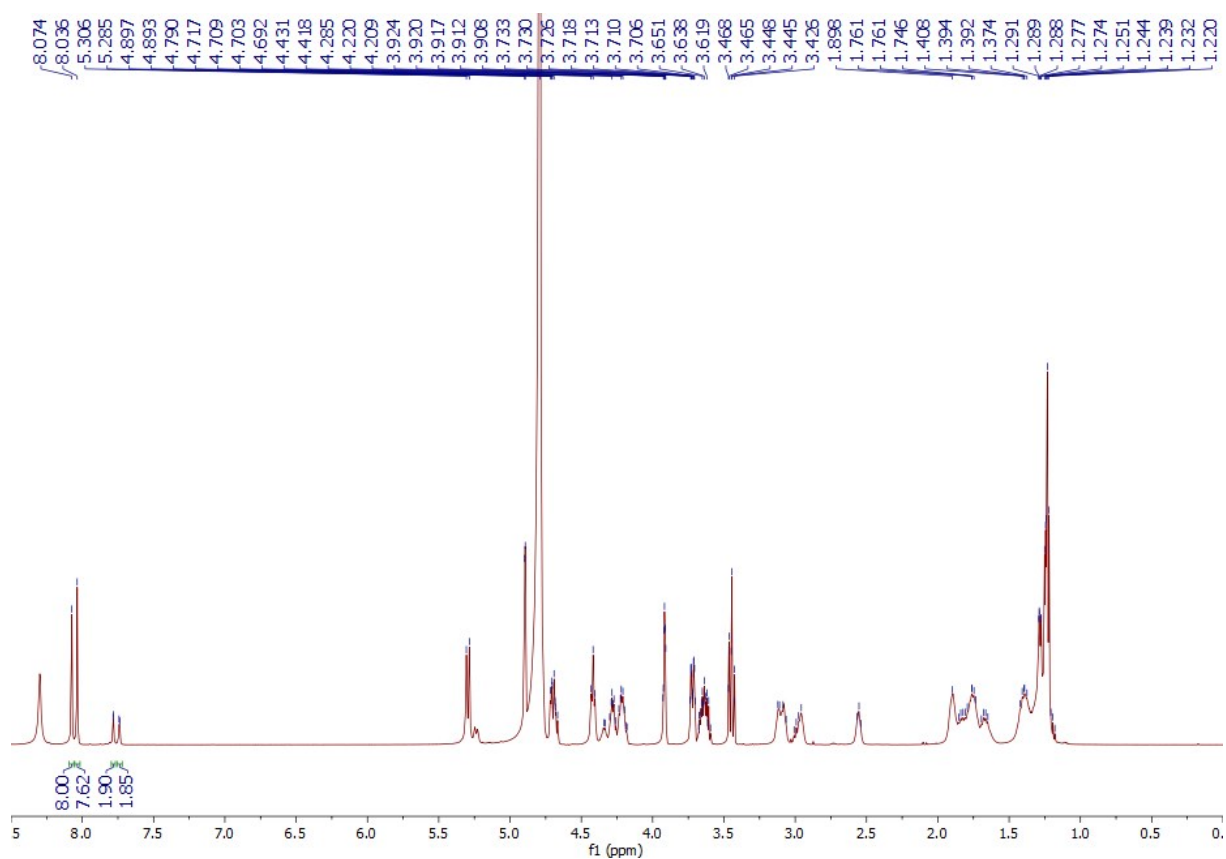

Figure S 46.  $^1\text{H}$  NMR ( $\text{D}_2\text{O}$ , 500 MHz) spectrum of compound **15**

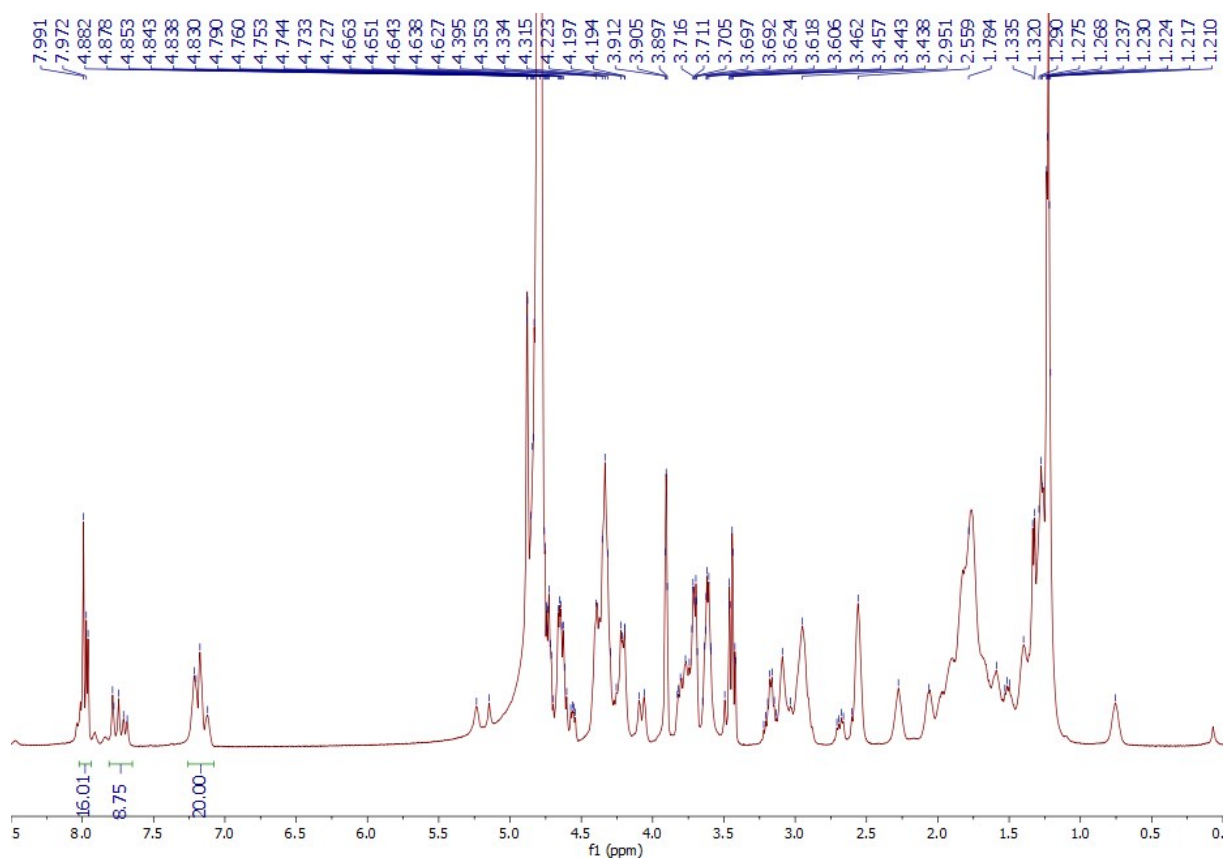

Figure S 47.  $^1\text{H}$  NMR ( $\text{D}_2\text{O}$ , 500 MHz) spectrum of compound **16DC**

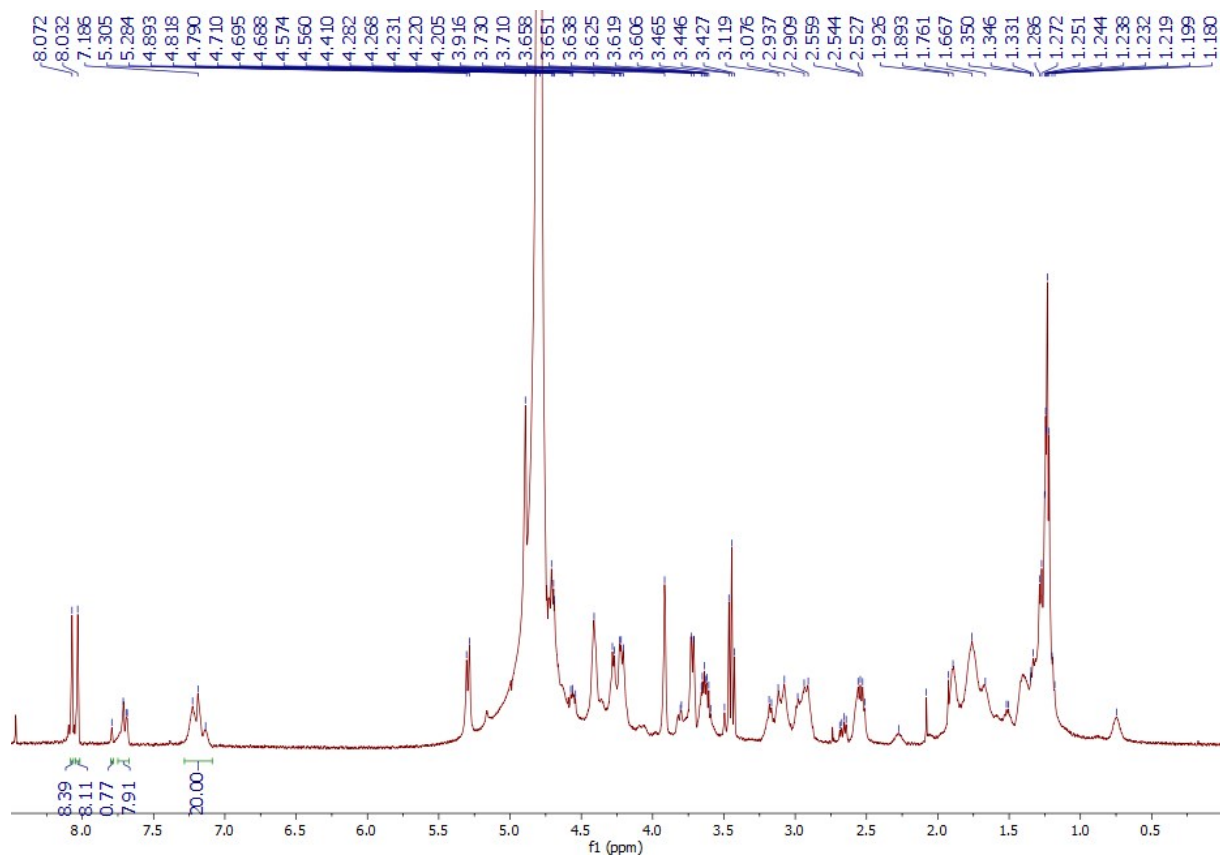

Figure S 48.  $^1\text{H}$  NMR ( $\text{D}_2\text{O}$ , 500 MHz) spectrum of compound **16CD**

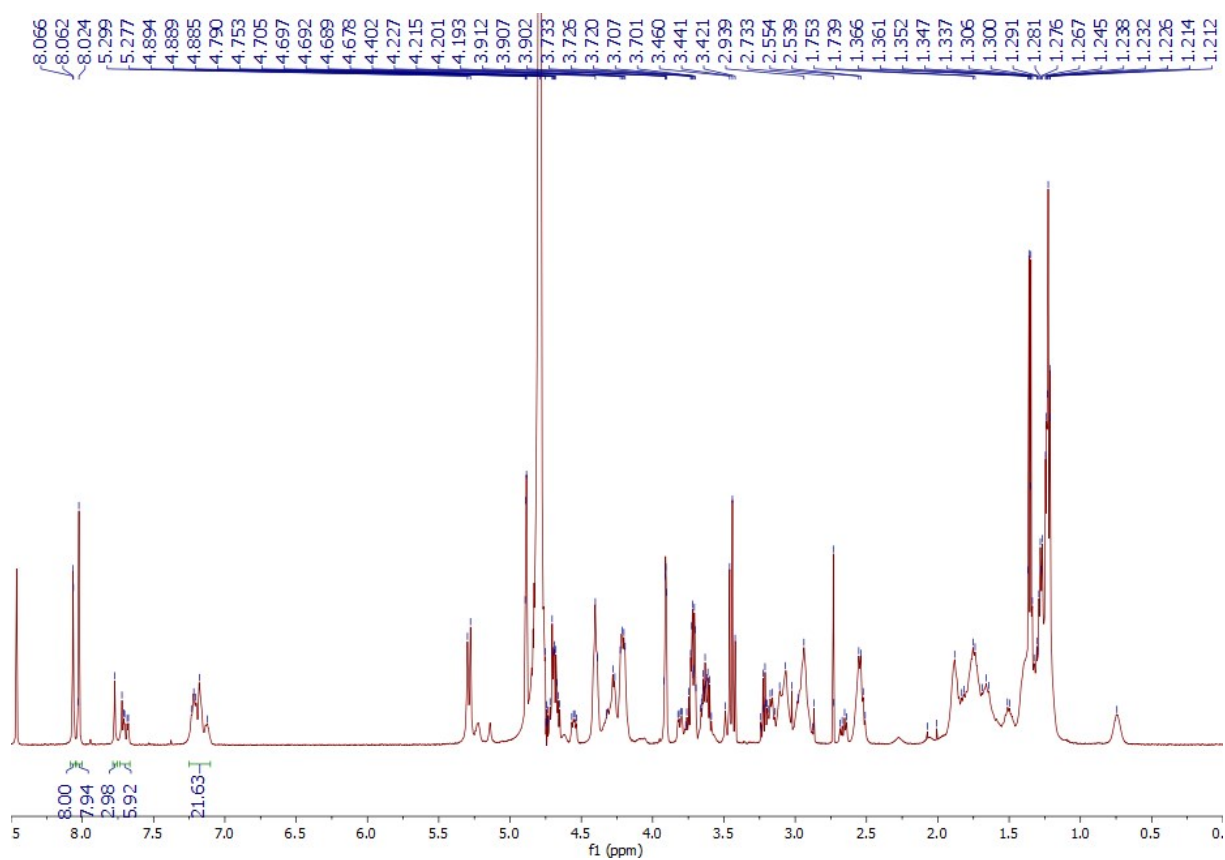

Figure S 49.  $^1\text{H}$  NMR ( $\text{D}_2\text{O}$ , 500 MHz) spectrum of compound **16DD**

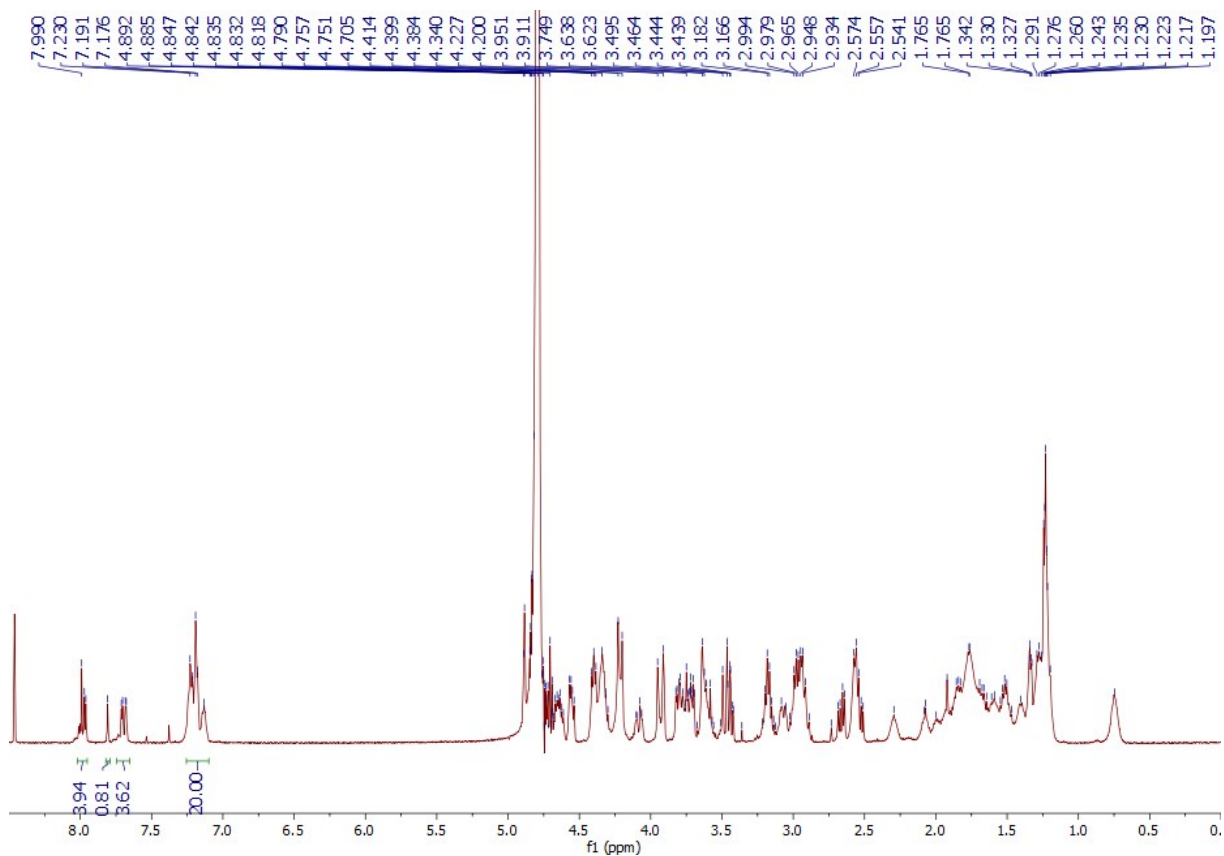

Figure S 50.  $^1\text{H}$  NMR ( $\text{D}_2\text{O}$ , 500 MHz) spectrum of compound **4C-P**

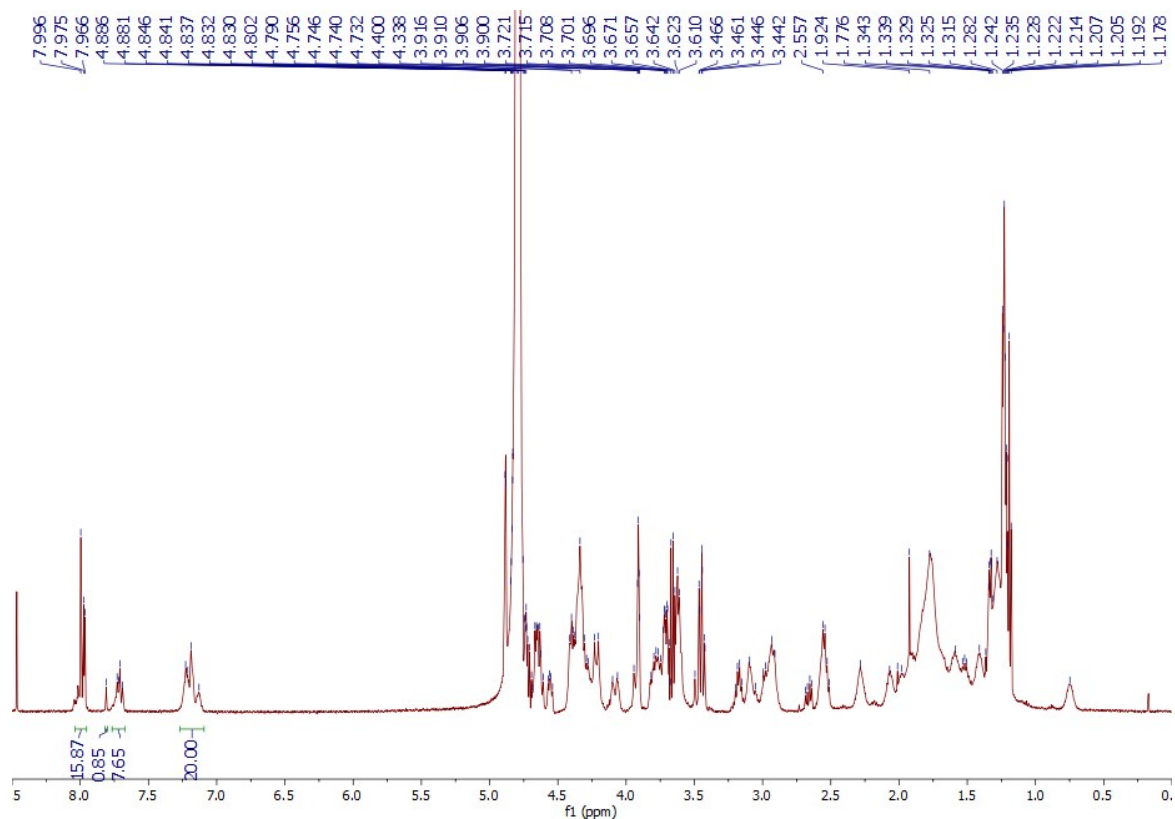

Figure S 51.  $^1\text{H}$  NMR ( $\text{D}_2\text{O}$ , 500 MHz) spectrum of compound **16CC-P**

$^1\text{H}$  NMR ( $\text{D}_2\text{O}$ , 500 MHz) spectrum of compounds **11**, **15**, **31**, **32** were in agreement with the literature.<sup>2</sup>

### Flow cytometry and cell viability assays

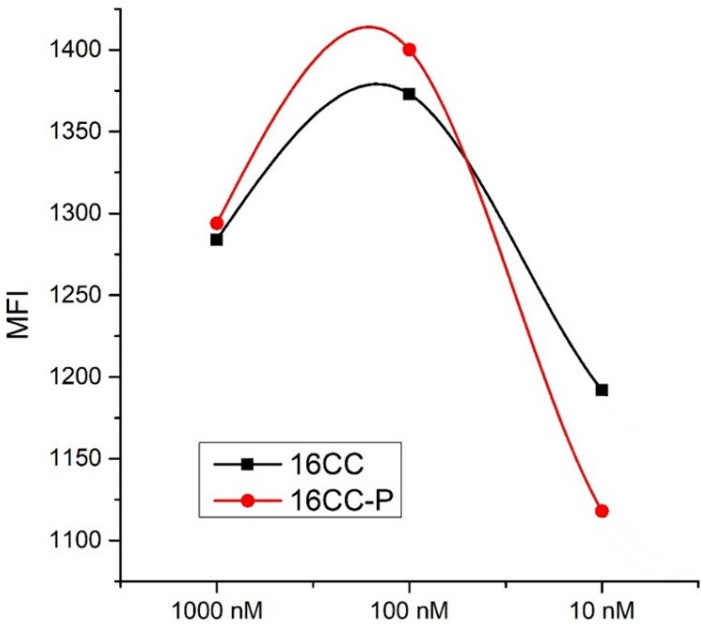

Figure S 52. Dose-dependent recruitment of IgM anti-Rha antibodies present in human serum to the M21 cell surface following cell treatment with various concentrations of **16CC** (10nM to 1µM). The anti-Rha antibodies recruitment was revealed with Alexa-Fluor488-conjugated anti-human IgM secondary antibody.

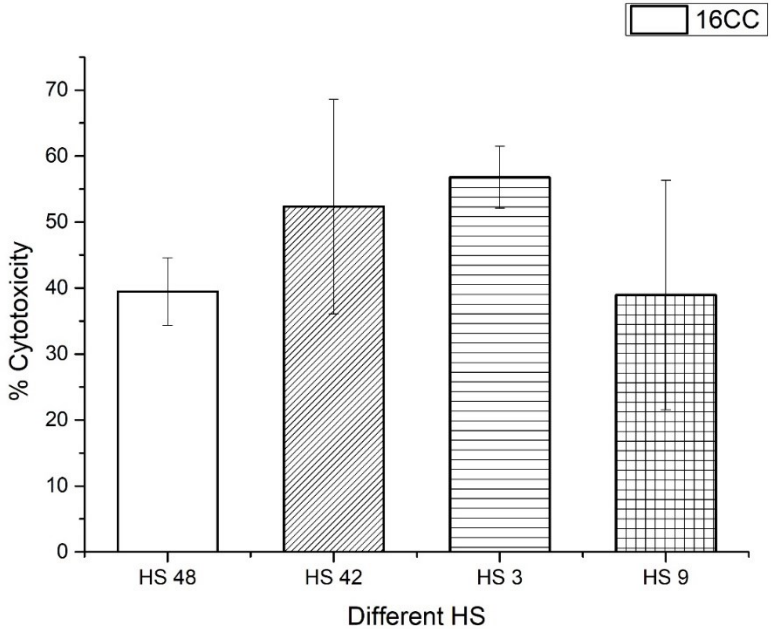

Figure S 53. Comparison of the cytotoxicity induced by **16CC** and 4 four different human serums against M21 cells (HS 48 and HS 42 were commercially purchased from Sigma. HS 3 and HS 9 were obtained from EFS). M21 cells were treated with 100nM of **16CC** and human serum 50% (used as source of anti-rhamnase and complement).

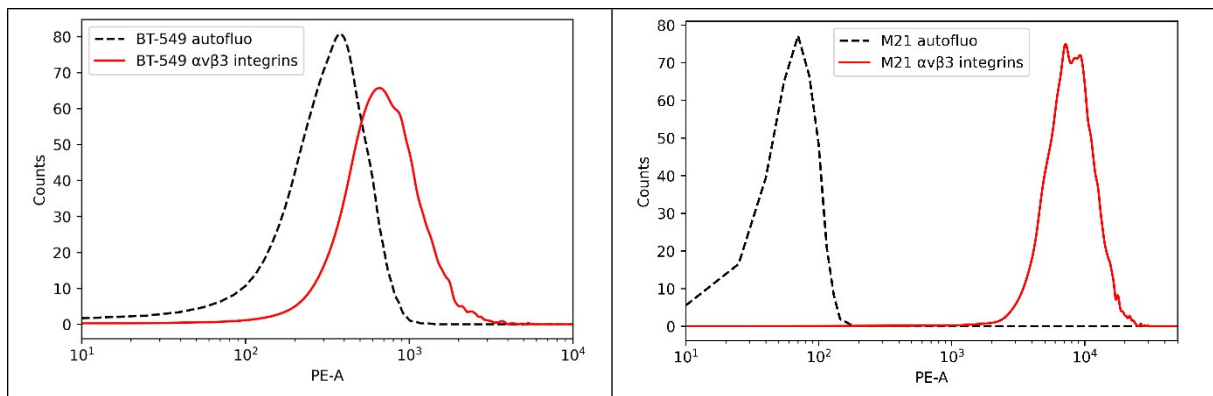

Figure S 54. Immunostaining of  $\alpha_v\beta_3$  integrins expressed on BT-549 and M21 cells by treatment with an anti-CD51/CD61 conjugated phycoerythrin (PE) antibody. The result is reported as phycoerythrin fluorescence (PE-A) histogram counts.

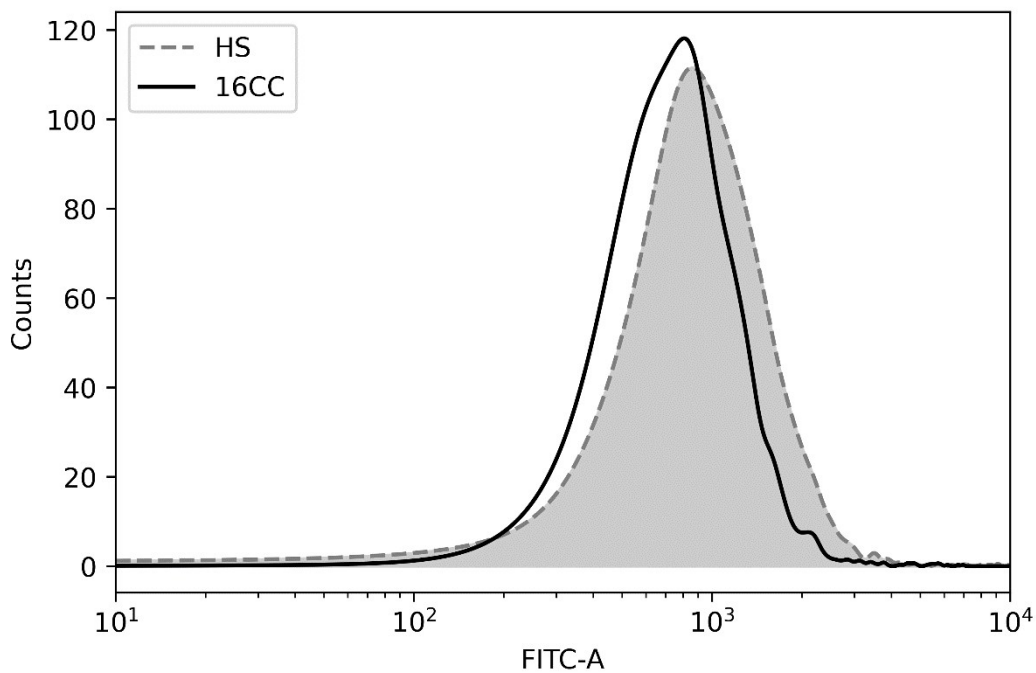

Figure S 55. Representative flow cytometry plots illustrating the absence of recruitment of IgM anti-Rha antibodies present in human serum (HS) to the BT-549 cell surface after cell treatment with 16CC. Cells were successively incubated with ARG, HS then Alexa-Fluor488-conjugated anti-human IgM secondary antibody to reveal human anti-Rha binding at the cell surface. Cells incubated with HS without ARG was used as control.

## Cytotoxicity towards BT-549 cells

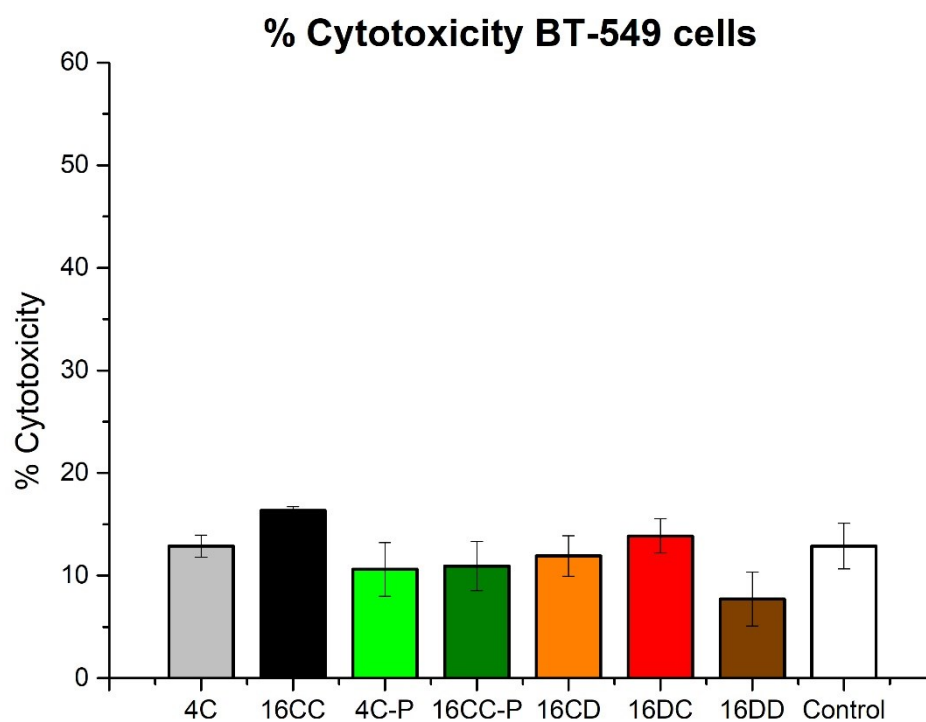

Figure S 56. Cytotoxicity induced by ARGs (100nM) and human serum (50%) towards BT-549 cells that have a low  $\alpha_v\beta_3$  integrin expression (average value of 4 successive experiments). Cells incubated with unglycosylated compound **9** and human serum was used as control.



## References

- (1) I. Bossu, N. Berthet, P. Dumy and O. Renaudet, *J. Carbohydr. Chem.*, 2011, **30**, 458–468.
- (2) B. Liet, E. Laigre, D. Goyard, B. Todaro, C. Tiertant, D. Boturyn, N. Berthet and O. Renaudet, *Chem. – A Eur. J.*, 2019, **25**, 15508–15515.
